# Supplementary material for: Formation of phosphanoxy-substituted phosphaalkenes via sterically promoted cleavage of the PP diphosphene bond
Source: Royal Society of Chemistry journal article supplement (doi:10.1039/c4cc03274h), 2014-01-01
Supplement: c4cc03274h1.pdf [file c4cc03274h1.pdf]

Formation of phosphanoxy-substituted phosphalkenes via metathesis-type cleavage of  
the kinetically stabilised P=P bond

Shigekazu Ito,\* Shunsuke Okabe, Yasuhiro Ueta and Koichi Mikami

Department of Applied Chemistry, Graduate School of Science and Engineering,  
Tokyo Institute of Technology  
E-mail: ito.s.ao@m.titech.ac.jp

Table of Contents

|                                |    |
|--------------------------------|----|
| 1. General Information         | 2  |
| 2. Experimental Details        | 3  |
| 3. UV-Vis Spectrum             | 7  |
| 4. X-ray Crystallographic Data | 8  |
| 5. DFT Calculation Data        | 9  |
| 6. Copies of NMR Charts        | 20 |
| 7. References                  | 29 |

## 1. General Information

All manipulations with organolithium reagents were carried out under an argon atmosphere by means of the standard Schlenk techniques, and the employed solvents were dried by appropriate methods.  $^1\text{H}$ ,  $^{13}\text{C}\{^1\text{H}\}$ , and  $^{19}\text{F}$  NMR spectra were recorded on a Bruker AV300M spectrometer in  $\text{CDCl}_3$  at 298 K with internal  $\text{Me}_4\text{Si}$  ( $^1\text{H}$ ,  $^{13}\text{C}$ ) and benzotrifluoride (BTF,  $^{19}\text{F}$ ) standards.  $^{31}\text{P}\{^1\text{H}\}$  NMR spectra were recorded on a Bruker AV300M spectrometer in  $\text{CDCl}_3$  at 298 K with an external 85%  $\text{H}_3\text{PO}_4$  ( $^{31}\text{P}$ ) standard. UV-Vis spectra were recorded with a Jasco V570 and a Hitachi U-4100 spectrometers. MS spectra were taken on a JEOL T100LC spectrometer. X-ray diffraction data were collected on a Rigaku RAXIS-Rapid diffractometer, and structures were solved by a direct method (SHELXL-97).<sup>1</sup> The X-ray structure solution and refinement were carried out using the Yadokari-XG software.<sup>2</sup> DFT calculations for a single and isolated species were carried out with Gaussian 09 program package.<sup>3</sup> Compound **1** was synthesized according to the previous report.<sup>4</sup>

## 2. Experimental Details

**3:** To a solution of **1** (276 mg, 0.50 mmol) in THF (13 mL) was added *n*-butyllithium (0.75 mmol, 1.60 M solution in hexane, 1 M = 1 mol dm<sup>-3</sup>) at -40 °C. After stirring at -40 °C for 5 min, benzoyl chloride (93 μL 0.80 mmol) was added to reaction mixture at -40 °C. The reaction mixture was allowed to warm to room temperature and stirred for 1 h. The volatile materials were removed *in vacuo*, and the resulting residue was dissolved in hexane and filtrated off. The solvent was removed *in vacuo*, and residual solid was recrystallized from EtOAc-MeCN to afford **3** as a yellow solid (243 mg, 68% yield).

Mp 137–139 °C; <sup>1</sup>H NMR (300 MHz, CDCl<sub>3</sub>) δ 0.79 (t, 3H, PC<sub>3</sub>H<sub>6</sub>Me), 1.30–1.60 (m, 5H, PBU), 1.37 (s, 9H, *p*-tBu), 1.39 (s, 9H, *p*-tBu), 1.42 (s, 9H, *o*-tBu), 1.54 (s, 9H, *o*-tBu), 1.65 (s, 18H, *o*-tBu), 2.35–2.42 (m, 1H, PCHHPr), 6.65 (d, 2H, <sup>3</sup>J(H,H) = 7.8 Hz, Ph), 6.92 (pt, 2H, {<sup>3</sup>J(H,H)+<sup>3</sup>J(H,H)}/2 = 7.7 Hz, Ph), 7.03 (t, 1H, <sup>3</sup>J(H,H) = 7.5 Hz, Ph), 7.39 (d, <sup>4</sup>J(P,H) = 0.90 Hz, 2H, *m*-Mes\*), 7.48 (d, <sup>4</sup>J(P,H) = 1.8 Hz, 2H, *m*-Mes\*); <sup>31</sup>P{<sup>1</sup>H} NMR (121 MHz, CDCl<sub>3</sub>) δ 127.5 (d, <sup>2</sup>J(P,P) = 135.5 Hz, P<sub>sp3</sub>), 166.5 (d, <sup>2</sup>J(P,P) = 135.5 Hz, P<sub>sp2</sub>); <sup>13</sup>C NMR (75 MHz, CDCl<sub>3</sub>) δ 14.0 (s, PC<sub>3</sub>H<sub>6</sub>Me), 23.8 (d, <sup>3</sup>J(P,C) = 13.6 Hz, PC<sub>2</sub>H<sub>4</sub>CH<sub>2</sub>Me), 28.2 (d, <sup>2</sup>J(P,C) = 21.9 Hz, PCH<sub>2</sub>CH<sub>2</sub>Et), 31.5 (s, *p*-CMe<sub>3</sub>), 31.7 (s, *p*-CMe<sub>3</sub>), 32.5 (d, <sup>4</sup>J(P,C) = 7.5 Hz, *o*-CMe<sub>3</sub>), 32.8 (d, <sup>4</sup>J(P,C) = 6.8 Hz, *o*-CMe<sub>3</sub>), 34.5 (d, <sup>4</sup>J(P,C) = 9.1 Hz, *o*-CMe<sub>3</sub>), 35.1 (s, *p*-CMe<sub>3</sub>), 35.2 (s, *p*-CMe<sub>3</sub>), 37.3 (dd, <sup>1</sup>J(P,C) = 25.3 Hz, <sup>4</sup>J(P,C) = 3.4 Hz, PCH<sub>2</sub>Pr), 38.2 (d, <sup>3</sup>J(P,C) = 7.5 Hz, *o*-CMe<sub>3</sub>), 39.1 (d, <sup>3</sup>J(P,C) = 3.8 Hz, *o*-CMe<sub>3</sub>), 122.3 (d, <sup>3</sup>J(P,C) = 15.1 Hz, *m*-Mes\*), 122.9 (d, <sup>3</sup>J(P,C) = 5.3 Hz, *m*-Mes\*), 126.8 (d, J(P,C) = 6.0 Hz, Ph), 127.2 (d, J(P,C) = 2.3 Hz, Ph), 127.3 (d, J(P,C) = 3.8 Hz, Ph), 133.4 (dd, <sup>1</sup>J(P,C) = 59.6 Hz, <sup>4</sup>J(P,C) = 11.3 Hz, *ipso*-Mes\*), 139.6 (d, <sup>2</sup>J(P,C) = 16.6 Hz, *ipso*-Ph), 140.4 (d, <sup>1</sup>J(P,C) = 61.9 Hz, *ipso*-Mes\*), 150.0 (d, <sup>4</sup>J(P,C) = 1.5 Hz, *p*-Mes\*), 150.7 (s, *p*-Mes\*), 155.1 (d, <sup>2</sup>J(P,C) = 2.3 Hz, *o*-Mes\*), 155.4 (d, <sup>2</sup>J(P,C) = 14.3 Hz, *o*-Mes\*), 194.7 (dd, <sup>1</sup>J(P,C) = 40.4 Hz, <sup>2</sup>J(P,C) = 15.5 Hz, P=C); APCI-MS Calcd. for C<sub>47</sub>H<sub>73</sub>OP<sub>2</sub> [M+H]<sup>+</sup>: 715.5137, Found: 715.5102.

**5:** To a solution of **1** (276 mg, 0.50 mmol) in THF (13 mL) was added *n*-butyllithium (0.75 mmol) at -40 °C. After stirring at -40 °C for 5 min, 4-(trifluoromethyl)benzoyl chloride (119 μL 0.80 mmol) was added to reaction mixture at -40 °C. The reaction mixture was allowed to warm to room temperature and stirred for 1 h. The volatile materials were removed *in vacuo*, and the resulting residue was dissolved in hexane and filtrated off. The solvent was removed *in vacuo*, and residual solid was recrystallized from EtOH-MeCN to afford **5** as a

yellow solid (165 mg, 42% yield).

Mp 124–125 °C;  $^1\text{H}$  NMR (300 MHz,  $\text{CDCl}_3$ )  $\delta$  0.77 (t, 3H,  $^3J(\text{H,H}) = 7.1$  Hz,  $\text{PC}_3\text{H}_6\text{Me}$ ), 1.30–1.60 (m, 5H, PBu), 1.34 (s, 9H, *p*-tBu), 1.36 (s, 9H, *p*-tBu), 1.38 (s, 9H, *o*-tBu), 1.50 (s, 9H, *o*-tBu), 1.61 (s, 18H, *o*-tBu), 2.36–2.42 (m, 1H, PCHHPr), 6.70 (d, 2H,  $^3J(\text{H,H}) = 8.3$  Hz, Ph), 7.15 (d, 2H,  $^3J(\text{H,H}) = 8.3$  Hz, Ph), 7.36 (s, 2H, *m*-Mes\*), 7.46 (d, 2H,  $^4J(\text{P,H}) = 2.1$  Hz, *m*-Mes\*);  $^{31}\text{P}\{^1\text{H}\}$  NMR (121 MHz,  $\text{CDCl}_3$ )  $\delta$  129.3 (d,  $^3J(\text{P,P}) = 135.5$  Hz,  $\text{P}_{\text{sp}3}$ ), 176.0 (d,  $^3J(\text{P,P}) = 135.5$  Hz,  $\text{P}_{\text{sp}2}$ );  $^{19}\text{F}$  NMR (282 MHz,  $\text{CDCl}_3$ )  $\delta$  -62.7 (s);  $^{13}\text{C}$  NMR (75 MHz,  $\text{CDCl}_3$ )  $\delta$  14.0 (s,  $\text{PC}_3\text{H}_6\text{Me}$ ), 23.8 (d,  $^3J(\text{P,C}) = 12.8$  Hz,  $\text{PC}_2\text{H}_4\text{CH}_2\text{Me}$ ), 28.2 (d,  $^2J(\text{P,C}) = 21.1$  Hz,  $\text{PCH}_2\text{CH}_2\text{Et}$ ), 31.4 (s, *p*-CMe<sub>3</sub>), 31.6 (s, *p*-CMe<sub>3</sub>), 32.5 (d,  $^4J(\text{P,C}) = 7.5$  Hz, *o*-CMe<sub>3</sub>), 32.8 (d,  $^4J(\text{P,C}) = 6.8$  Hz, *o*-CMe<sub>3</sub>), 34.5 (d,  $^4J(\text{P,C}) = 7.5$  Hz, *o*-CMe<sub>3</sub>), 35.1 (s, *p*-CMe<sub>3</sub>), 35.2 (s, *p*-CMe<sub>3</sub>), 37.2 (dd,  $^1J(\text{P,C}) = 24.9$  Hz,  $^4J(\text{P,C}) = 3.0$  Hz,  $\text{PCH}_2\text{Pr}$ ), 38.2 (d,  $^3J(\text{P,C}) = 7.5$  Hz, *o*-CMe<sub>3</sub>), 39.1 (d,  $^3J(\text{P,C}) = 3.8$  Hz, *o*-CMe<sub>3</sub>), 122.4 (d,  $^3J(\text{P,C}) = 20.4$  Hz, *m*-Mes\*), 123.0 (d,  $^3J(\text{P,C}) = 6.0$  Hz, *m*-Mes\*), 124.0–124.2 (m, Ph), 124.3 (q,  $^1J(\text{F,C}) = 271.7$  Hz,  $\text{CF}_3$ ), 126.8 (d,  $^3J(\text{P,C}) = 6.8$  Hz, Ph), 128.6 (qd,  $^2J(\text{F,C}) = 32.5$  Hz,  $^5J(\text{P,C}) = 4.5$  Hz, Ph), 132.5 (dd,  $^1J(\text{P,C}) = 59.6$  Hz,  $^4J(\text{P,C}) = 12.1$  Hz, *ipso*-Mes\*), 139.7 (d,  $^1J(\text{P,C}) = 61.1$  Hz, *ipso*-Mes\*), 142.4 (d,  $^2J(\text{P,C}) = 15.1$  Hz, Ph), 150.2 (d,  $^4J(\text{P,C}) = 1.5$  Hz, *p*-Mes\*), 151.2 (s, *p*-Mes\*), 155.2 (d,  $^2J(\text{P,C}) = 2.3$  Hz, *o*-Mes\*), 155.4 (d,  $^2J(\text{P,C}) = 14.3$  Hz, *o*-Mes\*), 192.8 (dd,  $^1J(\text{P,C}) = 40.4$  Hz,  $^2J(\text{P,C}) = 16.2$  Hz, P=C); APCI-MS Calcd. for  $\text{C}_{48}\text{H}_{72}\text{F}_3\text{OP}_2$   $[\text{M}+\text{H}]^+$ : 783.5011, Found: 783.5045.

**6:** To a solution of **1** (276 mg, 0.50 mmol) in THF (13 mL) was added *n*-butyllithium (0.75 mmol) at -40 °C. After stirring at -40 °C for 5 min, a solution of 4-methoxybenzoyl chloride (136 mg 0.80 mmol) in THF (1 mL) was added to reaction mixture at -40 °C. The reaction mixture was allowed to warm to room temperature and stirred for 1 h. The volatile materials were removed *in vacuo*, and the resulting residue was dissolved in hexane and filtrated off. The solvent was removed *in vacuo*, and residual solid was recrystallized from EtOH-MeCN to afford **6** as a pale yellow solid (277 mg, 74% yield).

Mp 148–150 °C;  $^1\text{H}$  NMR (300 MHz,  $\text{CDCl}_3$ )  $\delta$  0.76 (t, 3H,  $^3J(\text{H,H}) = 7.1$  Hz,  $\text{PC}_3\text{H}_6\text{Me}$ ), 1.30–1.60 (m, 5H, PBu), 1.33 (s, 9H, *t*Bu), 1.36 (s, 9H, *t*Bu), 1.40 (s, 9H, *t*Bu), 1.50 (s, 9H, *t*Bu), 1.61 (s, 18H, *o*-tBu), 2.31–2.36 (m, 1H,  $\text{PCH}_2\text{Pr}$ ), 3.70 (s, 3H, OMe), 6.42 (d, 2H,  $^3J(\text{H,H}) = 9.3$  Hz, Ar), 6.55 (dd, 2H,  $^3J(\text{H,H}) = 9.3$  Hz,  $^4J(\text{H,P}) = 2.1$  Hz, Ar), 7.36 (d, 2H,  $^4J(\text{H,P}) = 1.2$  Hz, *m*-Mes\*), 7.44 (d, 2H,  $^4J(\text{H,P}) = 1.8$  Hz, *m*-Mes\*);  $^{31}\text{P}\{^1\text{H}\}$  NMR (121 MHz,  $\text{CDCl}_3$ )  $\delta$  126.8 (d,  $^3J(\text{P,P}) = 135.5$  Hz,  $\text{P}_{\text{sp}3}$ ), 157.5 (d,  $^3J(\text{P,P}) = 135.5$  Hz,  $\text{P}_{\text{sp}2}$ );  $^{13}\text{C}$

NMR (75 MHz, CDCl<sub>3</sub>)  $\delta$  14.1 (s, PC<sub>3</sub>H<sub>6</sub>Me), 23.8 (d, <sup>3</sup>J(P,C) = 12.8 Hz, PC<sub>2</sub>H<sub>4</sub>CH<sub>2</sub>Me), 28.3 (d, <sup>2</sup>J(P,C) = 21.9 Hz, PCH<sub>2</sub>CH<sub>2</sub>Et), 31.5 (s, *p*-CMe<sub>3</sub>), 31.7 (s, *p*-CMe<sub>3</sub>), 32.5 (d, <sup>4</sup>J(P,C) = 7.5 Hz, *o*-CMe<sub>3</sub>), 32.7 (d, <sup>4</sup>J(P,C) = 6.8 Hz, *o*-CMe<sub>3</sub>), 34.5 (d, <sup>4</sup>J(P,C) = 7.5 Hz, *o*-CMe<sub>3</sub>), 35.1 (s, *p*-CMe<sub>3</sub>), 35.2 (s, *p*-CMe<sub>3</sub>), 37.4 (dd, <sup>1</sup>J(P,C) = 25.7 Hz, <sup>4</sup>J(P,C) = 3.0 Hz, PCH<sub>2</sub>Pr), 38.3 (d, <sup>3</sup>J(P,C) = 7.5 Hz, *o*-CMe<sub>3</sub>), 39.1 (d, <sup>3</sup>J(P,C) = 3.8 Hz, *o*-CMe<sub>3</sub>), 55.1 (s, OMe), 112.5 (d, <sup>3</sup>J(P,C) = 2.3 Hz, Ph), 122.3 (d, <sup>3</sup>J(P,C) = 25.7 Hz, *m*-Mes\*), 122.9 (d, <sup>3</sup>J(P,C) = 6.0 Hz, *m*-Mes\*), 128.4 (d, <sup>4</sup>J(P,C) = 6.8 Hz, Ph), 133.0 (d, <sup>2</sup>J(P,C) = 16.6 Hz, Ph), 133.9 (dd, <sup>1</sup>J(P,C) = 60.4 Hz, <sup>4</sup>J(P,C) = 11.3 Hz, *ipso*-Mes\*), 140.6 (d, <sup>1</sup>J(P,C) = 61.9 Hz, *ipso*-Mes\*), 149.9 (d, <sup>4</sup>J(P,C) = 1.5 Hz, *p*-Mes\*), 150.5 (s, *p*-Mes\*), 155.2 (s, *o*-Mes\*), 155.4 (d, <sup>2</sup>J(P,C) = 15.8 Hz, *o*-Mes\*), 158.7 (d, <sup>5</sup>J(P,C) = 4.5 Hz, Ph), 194.4 (dd, <sup>1</sup>J(P,C) = 40.8 Hz, <sup>2</sup>J(P,C) = 15.8 Hz, P=C); APCI-MS Calcd. for C<sub>48</sub>H<sub>75</sub>O<sub>2</sub>P<sub>2</sub> [M+H]<sup>+</sup>: 745.5242, Found: 745.5236.

**7**: To a solution of **1** (276 mg, 0.50 mmol) in THF (13 mL) was added *n*-butyllithium (0.75 mmol) at -40 °C. After stirring at -40 °C for 5 min, pivaloyl chloride (68  $\mu$ L 0.80 mmol) was added to reaction mixture at -40 °C. The reaction mixture was allowed to warm to room temperature and stirred for 1 h. The volatile materials were removed *in vacuo*, and the resulting residue was dissolved in hexane and filtrated off. The solvent was removed *in vacuo*, and residual solid was recrystallized from *i*PrOH-MeCN to afford **7** as a colorless solid (124 mg, 36% yield).

Mp 138–139 °C; <sup>1</sup>H NMR (300 MHz, CDCl<sub>3</sub>)  $\delta$  0.73 (t, 3H, <sup>3</sup>J(H,H) = 7.2 Hz, PC<sub>3</sub>H<sub>6</sub>Me), 0.76 (s, 9H, *t*Bu), 0.80–1.40 (m, 4H, PCH<sub>2</sub>C<sub>2</sub>H<sub>4</sub>Me), 1.30 (s, 9H, *p*-*t*Bu), 1.31 (s, 9H, *p*-*t*Bu), 1.49–1.61 (m, 1H, PCH<sub>2</sub>Pr), 1.54 (s, 9H, *o*-*t*Bu), 1.60 (s, 18H, *o*-*t*Bu), 1.61 (s, 9H, *o*-*t*Bu), 2.18–2.27 (m, 1H, PCH<sub>2</sub>Pr), 7.25–7.29 (m, 2H, *m*-Mes\*), 7.39 (d, 2H, <sup>4</sup>J(P,H) = 1.8 Hz, *m*-Mes\*); <sup>31</sup>P{<sup>1</sup>H} NMR (121 MHz, CDCl<sub>3</sub>)  $\delta$  124.3 (d, <sup>3</sup>J(P,P) = 145.8 Hz, P<sub>sp3</sub>), 153.1 (d, <sup>3</sup>J(P,P) = 145.8 Hz, P<sub>sp2</sub>); <sup>13</sup>C NMR (75 MHz, CDCl<sub>3</sub>)  $\delta$  14.0 (s, PC<sub>3</sub>H<sub>6</sub>Me), 24.2 (d, <sup>3</sup>J(P,C) = 13.6 Hz, PC<sub>2</sub>H<sub>4</sub>CH<sub>2</sub>Me), 27.6 (d, <sup>2</sup>J(P,C) = 24.2 Hz, PCH<sub>2</sub>CH<sub>2</sub>Et), 27.9 (d, <sup>3</sup>J(P,C) = 3.8 Hz, P=CCMe<sub>3</sub>), 31.4 (s, *p*-CMe<sub>3</sub>), 31.6 (s, *p*-CMe<sub>3</sub>), 33.3 (d, <sup>4</sup>J(P,C) = 8.3 Hz, *o*-CMe<sub>3</sub>), 33.5 (d, <sup>4</sup>J(P,C) = 7.5 Hz, *o*-CMe<sub>3</sub>), 34.6 (d, <sup>4</sup>J(P,C) = 7.5 Hz, *o*-CMe<sub>3</sub>), 35.0 (s, *p*-CMe<sub>3</sub>), 35.1 (s, *p*-CMe<sub>3</sub>), 37.6 (dd, <sup>1</sup>J(P,C) = 25.7 Hz, <sup>4</sup>J(P,C) = 4.5 Hz, PCH<sub>2</sub>Pr), 38.4 (d, <sup>3</sup>J(P,C) = 3.0 Hz, *o*-CMe<sub>3</sub>), 39.1 (d, <sup>3</sup>J(P,C) = 4.5 Hz, *o*-CMe<sub>3</sub>), 44.8 (d, <sup>2</sup>J(P,C) = 16.6 Hz, P=CCMe<sub>3</sub>), 121.0 (s, *m*-Mes\*), 122.5 (d, <sup>3</sup>J(P,C) = 6.0 Hz, *m*-Mes\*), 133.6 (dd, <sup>1</sup>J(P,C) = 64.2 Hz, <sup>4</sup>J(P,C) = 12.1 Hz, *ipso*-Mes\*), 142.0 (dd, <sup>1</sup>J(P,C) = 63.0 Hz, <sup>4</sup>J(P,C) = 2.6 Hz, *ipso*-Mes\*), 150.0 (d, <sup>4</sup>J(P,C) = 2.3 Hz, *p*-Mes\*), 150.2 (s, *p*-Mes\*), 155.3 (dd, <sup>2</sup>J(P,C) = 7.9 Hz, <sup>5</sup>J(P,C) = 2.6 Hz, *o*-Mes\*),

156.1 (d,  $^2J(\text{P,C}) = 14.3$  Hz, *o*-Mes\*), 205.8 (dd,  $^1J(\text{P,C}) = 50.6$  Hz,  $^2J(\text{P,C}) = 9.8$  Hz, P=C); APCI-MS Calcd. for C<sub>45</sub>H<sub>77</sub>OP<sub>2</sub> [M+H]<sup>+</sup>: 695.5450, Found: 695.5471.

**8**: To a solution of **1** (276 mg, 0.50 mmol) in THF (13 mL) was added phenyllithium (0.75 mmol, 1.08 M solution in cyclohexane-diethylether) at room temperature. After stirring at room temperature for 5 min, benzoyl chloride (93  $\mu\text{L}$  0.80 mmol) was added to reaction mixture at room temperature and stirred for 2 h. The volatile materials were removed *in vacuo*, and the resulting residue was dissolved in hexane and filtrated off. The solvent was removed *in vacuo*, and residual solid was recrystallized from *i*PrOH-MeCN to afford **8** as a yellow solid (202 mg, 55% yield).

Mp 152–153 °C; <sup>1</sup>H NMR (300 MHz, CDCl<sub>3</sub>)  $\delta$  1.37 (s, 9H, *t*Bu), 1.39 (s, 9H, *t*Bu), 1.40 (s, 9H, *t*Bu), 1.47 (s, 18H, *t*Bu), 1.54 (s, 9H, *t*Bu), 6.62–6.65 (m, 2H, Ph), 6.78–6.84 (m, 2H, Ph), 6.90 (pt, 2H,  $\{^3J(\text{H,H})+^3J(\text{H,H})\}/2 = 7.8$  Hz, Ph), 7.03 (t, 1H  $^3J(\text{H,H}) = 7.5$  Hz, Ph), 7.14–7.17 (m, 3H, Ph), 7.39 (d, 2H,  $^4J(\text{P,H}) = 2.4$  Hz, *m*-Mes\*), 7.54 (d, 2H,  $^4J(\text{P,H}) = 2.4$  Hz, *m*-Mes\*); <sup>31</sup>P{<sup>1</sup>H} NMR (121 MHz, CDCl<sub>3</sub>)  $\delta$  108.0 (d,  $^3J(\text{P,P}) = 131.8$  Hz, P<sub>sp3</sub>), 164.6 (d,  $^3J(\text{P,P}) = 131.8$  Hz, P<sub>sp2</sub>); <sup>13</sup>C NMR (75 MHz, CDCl<sub>3</sub>)  $\delta$  31.4 (s, *p*-CMe<sub>3</sub>), 31.7 (s, *p*-CMe<sub>3</sub>), 32.6 (d,  $^4J(\text{P,C}) = 7.5$  Hz, *o*-CMe<sub>3</sub>), 32.8 (d,  $^4J(\text{P,C}) = 6.8$  Hz, *o*-CMe<sub>3</sub>), 34.4 (d,  $^4J(\text{P,C}) = 8.3$  Hz, *o*-CMe<sub>3</sub>), 35.2 (s, *p*-CMe<sub>3</sub>), 35.2 (s, *p*-CMe<sub>3</sub>), 38.3 (d,  $^3J(\text{P,C}) = 3.0$  Hz, *o*-CMe<sub>3</sub>), 39.4 (d,  $^3J(\text{P,C}) = 4.5$  Hz, *o*-CMe<sub>3</sub>), 122.4 (d,  $^3J(\text{P,C}) = 4.5$  Hz, *m*-Mes\*), 123.3 (d,  $^3J(\text{P,C}) = 6.8$  Hz, *m*-Mes\*), 127.0 (d,  $J(\text{P,C}) = 6.0$  Hz, Ph), 127.3 (d,  $J(\text{P,C}) = 3.0$  Hz, Ph), 127.4–127.6 (m, Ph $\times$ 2), 130.3 (d,  $^2J(\text{P,C}) = 17.4$  Hz, Ph), 132.8 (dd,  $^1J(\text{P,C}) = 60.4$  Hz,  $^4J(\text{P,C}) = 10.6$  Hz, *ipso*-Ar), 135.5 (dd,  $^1J(\text{P,C}) = 59.2$  Hz,  $^4J(\text{P,C}) = 1.9$  Hz, *ipso*-Ar), 139.5 (d,  $^2J(\text{P,C}) = 15.8$  Hz, *ipso*-Ph), 146.1 (dd,  $^1J(\text{P,C}) = 27.2$  Hz,  $^4J(\text{P,C}) = 2.3$  Hz, *ipso*-Ar), 150.9 (s, *p*-Mes\*), 151.6 (d,  $^4J(\text{P,C}) = 1.5$  Hz, *p*-Mes\*), 155.2 (dd,  $^2J(\text{P,C}) = 3.8$  Hz,  $^5J(\text{P,C}) = 2.3$  Hz, *o*-Mes\*), 157.8 (d,  $^2J(\text{P,C}) = 15.8$  Hz, *o*-Mes\*), 193.9 (dd,  $^1J(\text{P,C}) = 41.5$  Hz,  $^2J(\text{P,C}) = 15.8$  Hz, P=C); APCI-MS Calcd. for C<sub>49</sub>H<sub>69</sub>OP<sub>2</sub> [M+H]<sup>+</sup>: 735.4824, Found: 735.4818.

### 3. UV-Vis Spectrum

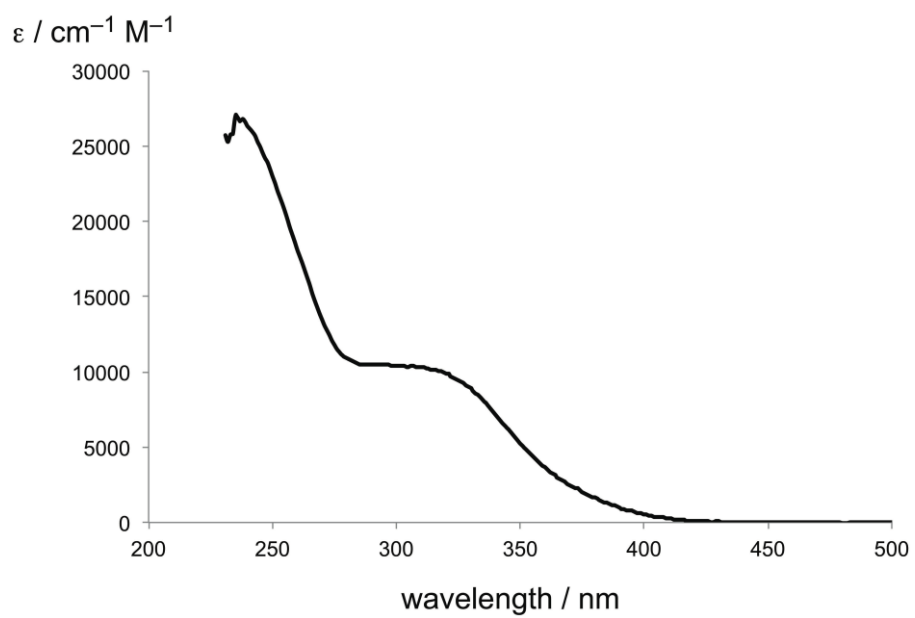

UV-Vis spectrum of **3** in  $\text{CH}_2\text{Cl}_2$ .

#### 4. X-ray Crystallography

**3:** C<sub>47</sub>H<sub>70</sub>OP<sub>2</sub>, pale yellow prisms (CH<sub>2</sub>Cl<sub>2</sub>-MeOH),  $M_w = 714.99$ , crystal dimensions = 0.26 x 0.21 x 0.16 mm<sup>3</sup>, monoclinic, space group  $P2_1/n$  (#14),  $a = 15.1477(6)$ ,  $b = 18.6492(7)$ ,  $c = 16.6712(7)$  Å,  $\beta = 111.4075(13)^\circ$ ,  $V = 4384.6(3)$  Å<sup>3</sup>,  $Z = 4$ ,  $\lambda = 0.71075$  Å,  $T = 123$  K,  $\rho_{\text{calcd}} = 1.083$  g cm<sup>-3</sup>,  $\mu_{\text{MoK}\alpha} = 0.131$  mm<sup>-1</sup>,  $F_{000} = 1568$ , 41578 total reflections ( $2\theta_{\text{max}} = 54.96^\circ$ ), index ranges =  $-18 \leq h \leq 19$ ,  $-24 \leq k \leq 24$ ,  $-21 \leq l \leq 21$ , 10032 unique reflections ( $R_{\text{int}} = 0.0549$ ),  $R1 = 0.0394$  ( $I \geq 2\sigma(I)$ ), 0.0544 (all data),  $wR2 = 0.1164$  ( $I \geq 2\sigma(I)$ ), 0.1311 (all data),  $S = 0.937$  (739 parameters). CCDC-1000474 contains the supplementary crystallographic data for this paper. These data can be obtained free of charge from the Cambridge Crystallographic Data Centre via [www.ccdc.cam.ac.uk/data\\_request/cif](http://www.ccdc.cam.ac.uk/data_request/cif).



## 5. DFT Calculation Data

### 3A

# opt freq b3lyp/6-31g(d)  
E(RB3LYP) = -955.676137762 A.U.  
Dipole moment (field-independent basis, Debye):  
X= -0.7293 Y= 1.3573 Z= 1.0316 Tot= 1.8543  
Zero-point correction= 0.162929 (Hartree/Particle)  
Sum of electronic and zero-point Energies= -955.513208  
Sum of electronic and thermal Energies= -955.500980  
Sum of electronic and thermal Enthalpies= -955.500036  
Sum of electronic and thermal Free Energies= -955.551682

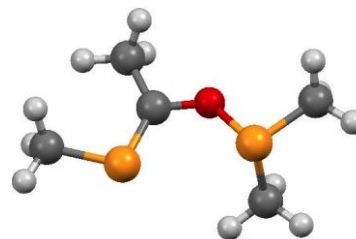

Standard orientation:

| Center Number | Atomic Number | Atomic Type | Coordinates (Angstroms) |           |           |
|---------------|---------------|-------------|-------------------------|-----------|-----------|
|               |               |             | X                       | Y         | Z         |
| 1             | 15            | 0           | -1.616500               | -0.339521 | -0.513229 |
| 2             | 15            | 0           | 1.558642                | -0.899960 | -0.234738 |
| 3             | 6             | 0           | -1.939269               | -1.386818 | 0.987606  |
| 4             | 1             | 0           | -2.821125               | -2.009850 | 0.794578  |
| 5             | 1             | 0           | -1.087913               | -2.049321 | 1.165960  |
| 6             | 1             | 0           | -2.119109               | -0.780128 | 1.881844  |
| 7             | 6             | 0           | 0.852315                | 0.619082  | 0.119177  |
| 8             | 8             | 0           | -0.498845               | 0.795970  | 0.141938  |
| 9             | 6             | 0           | 1.519047                | 1.923229  | 0.460352  |
| 10            | 1             | 0           | 2.604136                | 1.837603  | 0.522193  |
| 11            | 1             | 0           | 1.265725                | 2.678345  | -0.295360 |
| 12            | 1             | 0           | 1.137927                | 2.292069  | 1.421099  |
| 13            | 6             | 0           | 3.402808                | -0.531047 | -0.169013 |
| 14            | 1             | 0           | 3.736141                | -0.225801 | 0.828358  |
| 15            | 1             | 0           | 3.920533                | -1.461816 | -0.421718 |
| 16            | 1             | 0           | 3.709016                | 0.227704  | -0.896168 |
| 17            | 6             | 0           | -3.065889               | 0.809562  | -0.371924 |
| 18            | 1             | 0           | -2.977970               | 1.606151  | -1.116847 |
| 19            | 1             | 0           | -3.983419               | 0.247532  | -0.581763 |
| 20            | 1             | 0           | -3.139389               | 1.257921  | 0.624630  |

## 4A

# opt freq b3lyp/6-31g(d)  
 E(RB3LYP) = -955.694370212 A.U.  
 Dipole moment (field-independent basis, Debye):  
 X= -0.0491 Y= 2.5921 Z= 0.2970 Tot= 2.6095  
 Zero-point correction= 0.162866 (Hartree/Particle)  
 Sum of electronic and zero-point Energies= -955.531505  
 Sum of electronic and thermal Energies= -955.519043  
 Sum of electronic and thermal Enthalpies= -955.518099  
 Sum of electronic and thermal Free Energies= -955.569959

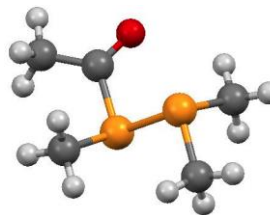

Standard orientation:

| Center<br>Number | Atomic<br>Number | Atomic<br>Type | Coordinates (Angstroms) |           |           |
|------------------|------------------|----------------|-------------------------|-----------|-----------|
|                  |                  |                | X                       | Y         | Z         |
| 1                | 15               | 0              | 1.362963                | -0.210695 | -0.616590 |
| 2                | 15               | 0              | -0.329502               | 0.525242  | 0.673962  |
| 3                | 6                | 0              | 2.689266                | 0.957420  | 0.011339  |
| 4                | 1                | 0              | 3.653769                | 0.614919  | -0.380954 |
| 5                | 1                | 0              | 2.520034                | 1.968070  | -0.374243 |
| 6                | 1                | 0              | 2.752513                | 0.997470  | 1.104414  |
| 7                | 6                | 0              | -1.681308               | -0.608123 | 0.006257  |
| 8                | 8                | 0              | -1.441855               | -1.782906 | -0.210734 |
| 9                | 6                | 0              | -3.084805               | -0.043502 | -0.143379 |
| 10               | 1                | 0              | -3.127504               | 0.634187  | -1.005144 |
| 11               | 1                | 0              | -3.786434               | -0.866760 | -0.300472 |
| 12               | 1                | 0              | -3.377508               | 0.533672  | 0.741403  |
| 13               | 6                | 0              | -0.727588               | 2.151163  | -0.171934 |
| 14               | 1                | 0              | -1.664126               | 2.550764  | 0.229444  |
| 15               | 1                | 0              | 0.061980                | 2.870081  | 0.068035  |
| 16               | 1                | 0              | -0.808531               | 2.071183  | -1.260624 |
| 17               | 6                | 0              | 1.817738                | -1.735830 | 0.361848  |
| 18               | 1                | 0              | 1.012999                | -2.466891 | 0.255382  |
| 19               | 1                | 0              | 2.735504                | -2.159427 | -0.062045 |
| 20               | 1                | 0              | 1.980417                | -1.528988 | 1.425316  |

## TS 4A to 3A

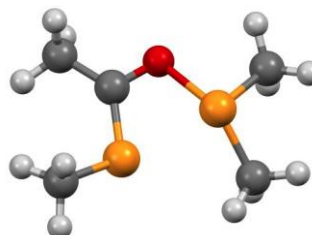

# opt=qst2 freq b3lyp/6-31g(d)  
 E(RB3LYP) = -955.628723220 A.U.  
 Dipole moment (field-independent basis, Debye):  
 X= -1.2483 Y= -0.0813 Z= -0.0572 Tot= 1.2523  
 Zero-point correction= 0.161903 (Hartree/Particle)  
 Sum of electronic and zero-point Energies= -955.466820  
 Sum of electronic and thermal Energies= -955.455147  
 Sum of electronic and thermal Enthalpies= -955.454203  
 Sum of electronic and thermal Free Energies= -955.504248

Standard orientation:

| Center Number | Atomic Number | Atomic Type | Coordinates (Angstroms) |           |           |
|---------------|---------------|-------------|-------------------------|-----------|-----------|
|               |               |             | X                       | Y         | Z         |
| 1             | 15            | 0           | 1.394697                | -0.112128 | 0.575770  |
| 2             | 15            | 0           | -0.977596               | -0.836273 | -0.411057 |
| 3             | 6             | 0           | 2.141938                | -1.571707 | -0.356625 |
| 4             | 1             | 0           | 3.202102                | -1.646064 | -0.077250 |
| 5             | 1             | 0           | 1.622356                | -2.491263 | -0.070462 |
| 6             | 1             | 0           | 2.087121                | -1.467967 | -1.445291 |
| 7             | 6             | 0           | -1.087689               | 0.890799  | -0.105267 |
| 8             | 8             | 0           | 0.065373                | 1.426742  | 0.031048  |
| 9             | 6             | 0           | -2.283765               | 1.802765  | -0.113855 |
| 10            | 1             | 0           | -3.216097               | 1.269176  | -0.312080 |
| 11            | 1             | 0           | -2.361625               | 2.313355  | 0.853922  |
| 12            | 1             | 0           | -2.144432               | 2.577066  | -0.877698 |
| 13            | 6             | 0           | -2.473860               | -1.633284 | 0.394747  |
| 14            | 1             | 0           | -3.384041               | -1.085899 | 0.122504  |
| 15            | 1             | 0           | -2.574362               | -2.656069 | 0.020275  |
| 16            | 1             | 0           | -2.393772               | -1.665293 | 1.485198  |
| 17            | 6             | 0           | 2.644581                | 1.112735  | -0.106765 |
| 18            | 1             | 0           | 2.447286                | 2.112189  | 0.285916  |
| 19            | 1             | 0           | 3.638811                | 0.786730  | 0.224240  |
| 20            | 1             | 0           | 2.649925                | 1.158268  | -1.201759 |

**3B**

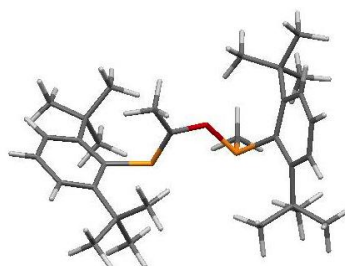

# opt freq b3lyp/6-31g(d)  
 E(RB3LYP) = -1968.07934506 A.U.  
 Dipole moment (field-independent basis, Debye):  
 X= 1.3368 Y= -0.5033 Z= -0.7042 Tot= 1.5926  
 Zero-point correction= 0.723092 (Hartree/Particle)  
 Sum of electronic and zero-point Energies= -1967.356253  
 Sum of electronic and thermal Energies= -1967.316480  
 Sum of electronic and thermal Enthalpies= -1967.315535  
 Sum of electronic and thermal Free Energies= -1967.426959

Standard orientation:

| Center Number | Atomic Number | Atomic Type | Coordinates (Angstroms) |           |           |
|---------------|---------------|-------------|-------------------------|-----------|-----------|
|               |               |             | X                       | Y         | Z         |
| 1             | 15            | 0           | 1.576604                | -0.055324 | 0.932446  |
| 2             | 15            | 0           | -1.647730               | 0.009077  | 0.796437  |
| 3             | 6             | 0           | 1.469400                | -1.392101 | 2.226550  |
| 4             | 1             | 0           | 2.216722                | -1.177419 | 2.998766  |
| 5             | 1             | 0           | 0.479092                | -1.287800 | 2.682372  |
| 6             | 1             | 0           | 1.591621                | -2.421290 | 1.890976  |
| 7             | 6             | 0           | -0.680135               | -0.505778 | -0.517549 |
| 8             | 8             | 0           | 0.658462                | -0.728311 | -0.358319 |
| 9             | 6             | 0           | -1.064052               | -0.806640 | -1.938253 |
| 10            | 1             | 0           | -2.134885               | -0.695703 | -2.105905 |
| 11            | 1             | 0           | -0.520189               | -0.135126 | -2.615433 |
| 12            | 1             | 0           | -0.765562               | -1.831837 | -2.191997 |
| 13            | 6             | 0           | 3.226585                | -0.058708 | 0.029109  |
| 14            | 6             | 0           | 3.738982                | -1.099943 | -0.825659 |
| 15            | 6             | 0           | 3.782655                | 1.262079  | -0.064200 |
| 16            | 6             | 0           | 4.534716                | -0.710678 | -1.911139 |
| 17            | 6             | 0           | 4.606022                | 1.561652  | -1.161102 |
| 18            | 6             | 0           | 4.917733                | 0.608354  | -2.114400 |
| 19            | 1             | 0           | 4.884253                | -1.451110 | -2.617225 |
| 20            | 1             | 0           | 5.002851                | 2.560432  | -1.284599 |
| 21            | 1             | 0           | 5.511717                | 0.876148  | -2.984644 |
| 22            | 6             | 0           | -3.341024               | 0.193563  | 0.005144  |
| 23            | 6             | 0           | -3.719971               | 1.440869  | -0.593560 |
| 24            | 6             | 0           | -4.245357               | -0.920013 | -0.017589 |
| 25            | 6             | 0           | -4.893250               | 1.466708  | -1.363798 |
| 26            | 6             | 0           | -5.399805               | -0.809308 | -0.808263 |
| 27            | 6             | 0           | -5.701905               | 0.349921  | -1.505768 |
| 28            | 1             | 0           | -5.193295               | 2.375255  | -1.867547 |
| 29            | 1             | 0           | -6.086982               | -1.640508 | -0.886422 |
| 30            | 1             | 0           | -6.592810               | 0.396603  | -2.127223 |
| 31            | 6             | 0           | 3.595757                | 2.405744  | 0.991245  |
| 32            | 6             | 0           | 3.628992                | -2.635873 | -0.560387 |
| 33            | 6             | 0           | -4.079988               | -2.240228 | 0.806026  |
| 34            | 6             | 0           | -2.958930               | 2.797385  | -0.422572 |

|    |   |   |           |           |           |
|----|---|---|-----------|-----------|-----------|
| 35 | 6 | 0 | -3.801373 | 3.993711  | -0.933620 |
| 36 | 1 | 0 | -3.270900 | 4.922002  | -0.695454 |
| 37 | 1 | 0 | -3.943357 | 3.977412  | -2.019778 |
| 38 | 1 | 0 | -4.785668 | 4.043260  | -0.455203 |
| 39 | 6 | 0 | -1.637116 | 2.838120  | -1.228229 |
| 40 | 1 | 0 | -1.202442 | 3.844211  | -1.174437 |
| 41 | 1 | 0 | -0.894928 | 2.134819  | -0.850689 |
| 42 | 1 | 0 | -1.821961 | 2.610098  | -2.284794 |
| 43 | 6 | 0 | -2.693534 | 3.095200  | 1.074009  |
| 44 | 1 | 0 | -3.634750 | 3.115578  | 1.635760  |
| 45 | 1 | 0 | -2.034047 | 2.363369  | 1.545037  |
| 46 | 1 | 0 | -2.216777 | 4.077775  | 1.175802  |
| 47 | 6 | 0 | -3.819526 | -1.927090 | 2.300486  |
| 48 | 1 | 0 | -3.773062 | -2.862659 | 2.871396  |
| 49 | 1 | 0 | -2.880952 | -1.394577 | 2.467949  |
| 50 | 1 | 0 | -4.632571 | -1.319018 | 2.713972  |
| 51 | 6 | 0 | -5.374807 | -3.092308 | 0.788778  |
| 52 | 1 | 0 | -5.601211 | -3.497419 | -0.203473 |
| 53 | 1 | 0 | -5.238134 | -3.947922 | 1.458840  |
| 54 | 1 | 0 | -6.246359 | -2.530726 | 1.142422  |
| 55 | 6 | 0 | -2.967242 | -3.156241 | 0.239761  |
| 56 | 1 | 0 | -3.148400 | -3.373397 | -0.819677 |
| 57 | 1 | 0 | -1.974441 | -2.715894 | 0.333239  |
| 58 | 1 | 0 | -2.963932 | -4.111114 | 0.780489  |
| 59 | 6 | 0 | 2.336442  | 3.260974  | 0.706590  |
| 60 | 1 | 0 | 1.414831  | 2.687666  | 0.818647  |
| 61 | 1 | 0 | 2.297576  | 4.109906  | 1.401319  |
| 62 | 1 | 0 | 2.370253  | 3.663867  | -0.312393 |
| 63 | 6 | 0 | 4.808142  | 3.375944  | 0.957102  |
| 64 | 1 | 0 | 5.762781  | 2.843444  | 1.032080  |
| 65 | 1 | 0 | 4.830901  | 3.999347  | 0.057916  |
| 66 | 1 | 0 | 4.736866  | 4.060693  | 1.809197  |
| 67 | 6 | 0 | 3.568767  | 1.857388  | 2.439825  |
| 68 | 1 | 0 | 2.665334  | 1.286268  | 2.665571  |
| 69 | 1 | 0 | 4.441000  | 1.223099  | 2.635863  |
| 70 | 1 | 0 | 3.592212  | 2.692333  | 3.150004  |
| 71 | 6 | 0 | 4.535814  | -3.457044 | -1.513474 |
| 72 | 1 | 0 | 5.582907  | -3.139711 | -1.472979 |
| 73 | 1 | 0 | 4.499782  | -4.507948 | -1.205595 |
| 74 | 1 | 0 | 4.197720  | -3.415727 | -2.554868 |
| 75 | 6 | 0 | 2.216759  | -3.236706 | -0.747291 |
| 76 | 1 | 0 | 1.465400  | -2.822672 | -0.082818 |
| 77 | 1 | 0 | 1.866152  | -3.066171 | -1.771241 |
| 78 | 1 | 0 | 2.261778  | -4.320347 | -0.582451 |
| 79 | 6 | 0 | 4.187428  | -2.911274 | 0.860250  |
| 80 | 1 | 0 | 4.069655  | -3.971702 | 1.116651  |
| 81 | 1 | 0 | 5.257253  | -2.674271 | 0.895769  |
| 82 | 1 | 0 | 3.701079  | -2.317383 | 1.631983  |

---

## 4B

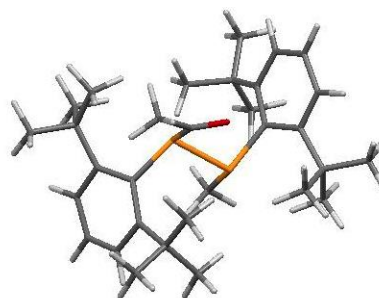

# opt freq b3lyp/6-31g(d)  
 E(RB3LYP) = -1968.06278369 A.U.  
 Dipole moment (field-independent basis, Debye):  
 X= -2.3505 Y= 0.7180 Z= -0.8323 Tot= 2.5948  
 Zero-point correction= 0.722731 (Hartree/Particle)  
 Sum of electronic and zero-point Energies= -1967.340053  
 Sum of electronic and thermal Energies= -1967.300093  
 Sum of electronic and thermal Enthalpies= -1967.299149  
 Sum of electronic and thermal Free Energies= -1967.408393

Standard orientation:

| Center<br>Number | Atomic<br>Number | Atomic<br>Type | Coordinates (Angstroms) |           |           |
|------------------|------------------|----------------|-------------------------|-----------|-----------|
|                  |                  |                | X                       | Y         | Z         |
| 1                | 15               | 0              | 0.815673                | -0.520639 | -0.765549 |
| 2                | 15               | 0              | -0.704527               | 0.289654  | 0.731008  |
| 3                | 6                | 0              | 0.074212                | 0.091404  | -2.375193 |
| 4                | 1                | 0              | 0.761560                | -0.193595 | -3.179459 |
| 5                | 1                | 0              | -0.852101               | -0.472796 | -2.518047 |
| 6                | 1                | 0              | -0.150171               | 1.153832  | -2.470823 |
| 7                | 6                | 0              | -0.168373               | -0.577450 | 2.306460  |
| 8                | 8                | 0              | 0.997804                | -0.898045 | 2.455567  |
| 9                | 6                | 0              | -1.143493               | -0.627927 | 3.476450  |
| 10               | 1                | 0              | -2.178896               | -0.782593 | 3.162134  |
| 11               | 1                | 0              | -0.831967               | -1.425122 | 4.157212  |
| 12               | 1                | 0              | -1.091757               | 0.324188  | 4.018977  |
| 13               | 6                | 0              | 2.393831                | 0.398359  | -0.263635 |
| 14               | 6                | 0              | 2.572853                | 1.810161  | -0.034205 |
| 15               | 6                | 0              | 3.386502                | -0.508403 | 0.243461  |
| 16               | 6                | 0              | 3.465684                | 2.196073  | 0.973483  |
| 17               | 6                | 0              | 4.263545                | -0.041077 | 1.234513  |
| 18               | 6                | 0              | 4.244818                | 1.274821  | 1.661470  |
| 19               | 1                | 0              | 3.575197                | 3.242648  | 1.224582  |
| 20               | 1                | 0              | 4.971316                | -0.719924 | 1.691532  |
| 21               | 1                | 0              | 4.892841                | 1.600778  | 2.471092  |
| 22               | 6                | 0              | -2.365970               | -0.280198 | 0.046433  |
| 23               | 6                | 0              | -3.275722               | 0.809149  | -0.207712 |
| 24               | 6                | 0              | -2.603746               | -1.543133 | -0.604507 |
| 25               | 6                | 0              | -4.146686               | 0.702835  | -1.303353 |
| 26               | 6                | 0              | -3.500531               | -1.561013 | -1.686272 |
| 27               | 6                | 0              | -4.213613               | -0.440921 | -2.081247 |
| 28               | 1                | 0              | -4.789819               | 1.537363  | -1.558463 |
| 29               | 1                | 0              | -3.649193               | -2.483533 | -2.235986 |
| 30               | 1                | 0              | -4.862481               | -0.479263 | -2.952423 |
| 31               | 6                | 0              | 3.651609                | -1.961388 | -0.282283 |
| 32               | 6                | 0              | 2.009423                | 2.949978  | -0.940291 |
| 33               | 6                | 0              | -2.093265               | -2.973219 | -0.223538 |

|    |   |   |           |           |           |
|----|---|---|-----------|-----------|-----------|
| 34 | 6 | 0 | -3.521867 | 2.102170  | 0.647816  |
| 35 | 6 | 0 | -5.026622 | 2.087060  | 1.051936  |
| 36 | 1 | 0 | -5.252367 | 2.974876  | 1.654376  |
| 37 | 1 | 0 | -5.705662 | 2.090472  | 0.196028  |
| 38 | 1 | 0 | -5.256775 | 1.201873  | 1.656113  |
| 39 | 6 | 0 | -3.238186 | 3.372540  | -0.187534 |
| 40 | 1 | 0 | -3.470824 | 4.268168  | 0.401560  |
| 41 | 1 | 0 | -2.184653 | 3.424199  | -0.476159 |
| 42 | 1 | 0 | -3.839920 | 3.413998  | -1.101084 |
| 43 | 6 | 0 | -2.762529 | 2.237479  | 1.983320  |
| 44 | 1 | 0 | -2.860118 | 1.336729  | 2.595839  |
| 45 | 1 | 0 | -1.703734 | 2.457983  | 1.854077  |
| 46 | 1 | 0 | -3.208771 | 3.063647  | 2.550534  |
| 47 | 6 | 0 | -3.357605 | -3.833896 | 0.071373  |
| 48 | 1 | 0 | -3.050729 | -4.842707 | 0.372026  |
| 49 | 1 | 0 | -3.940540 | -3.399352 | 0.891641  |
| 50 | 1 | 0 | -4.020680 | -3.935190 | -0.791664 |
| 51 | 6 | 0 | -1.308826 | -3.621147 | -1.390439 |
| 52 | 1 | 0 | -0.379554 | -3.077322 | -1.585638 |
| 53 | 1 | 0 | -1.045649 | -4.653578 | -1.129954 |
| 54 | 1 | 0 | -1.887389 | -3.654790 | -2.319046 |
| 55 | 6 | 0 | -1.227989 | -3.083376 | 1.038036  |
| 56 | 1 | 0 | -0.253205 | -2.614574 | 0.925319  |
| 57 | 1 | 0 | -1.736719 | -2.665241 | 1.910720  |
| 58 | 1 | 0 | -1.050098 | -4.144450 | 1.249752  |
| 59 | 6 | 0 | 2.810508  | -3.036462 | 0.444109  |
| 60 | 1 | 0 | 1.751353  | -2.951996 | 0.204837  |
| 61 | 1 | 0 | 3.152668  | -4.036630 | 0.146784  |
| 62 | 1 | 0 | 2.918816  | -2.944619 | 1.529832  |
| 63 | 6 | 0 | 5.140472  | -2.346066 | -0.057360 |
| 64 | 1 | 0 | 5.825884  | -1.578187 | -0.432812 |
| 65 | 1 | 0 | 5.376422  | -2.535069 | 0.994600  |
| 66 | 1 | 0 | 5.349264  | -3.276550 | -0.596991 |
| 67 | 6 | 0 | 3.447481  | -2.051137 | -1.814650 |
| 68 | 1 | 0 | 2.409706  | -1.890624 | -2.114530 |
| 69 | 1 | 0 | 4.074788  | -1.318397 | -2.335776 |
| 70 | 1 | 0 | 3.732307  | -3.050449 | -2.165531 |
| 71 | 6 | 0 | 2.711524  | 4.305816  | -0.669628 |
| 72 | 1 | 0 | 3.800999  | 4.232692  | -0.750271 |
| 73 | 1 | 0 | 2.371696  | 5.029940  | -1.418980 |
| 74 | 1 | 0 | 2.461798  | 4.721133  | 0.312857  |
| 75 | 6 | 0 | 0.505372  | 3.235435  | -0.760162 |
| 76 | 1 | 0 | -0.129357 | 2.375588  | -0.956721 |
| 77 | 1 | 0 | 0.299092  | 3.555116  | 0.267131  |
| 78 | 1 | 0 | 0.200258  | 4.045974  | -1.434674 |
| 79 | 6 | 0 | 2.352886  | 2.604061  | -2.411486 |
| 80 | 1 | 0 | 1.929373  | 3.356410  | -3.088805 |
| 81 | 1 | 0 | 3.440090  | 2.599120  | -2.551600 |
| 82 | 1 | 0 | 1.983897  | 1.625800  | -2.712748 |

---

#p casscf(2,2)/6-31g(d)

( 1) EIGENVALUE -1958.0331008043  
( 1) 0.9999974 ( 3) -0.0022851 ( 2) -0.0000023 (

Final one electron symbolic density matrix:

|   | 1             | 2            |
|---|---------------|--------------|
| 1 | 0.199999D+01  |              |
| 2 | -0.651500D-05 | 0.104431D-04 |

MCSCF converged.



### SP Calculation for 3 (X-ray)

# b3lyp/6-31g(d)

E(RB3LYP) = -2591.47150581 A.U.

Dipole moment (field-independent basis, Debye):

X= 0.1814 Y= 0.3223 Z= 0.9734 Tot= 1.0413

Standard orientation:

| Center<br>Number | Atomic<br>Number | Atomic<br>Type | Coordinates (Angstroms) |           |           |
|------------------|------------------|----------------|-------------------------|-----------|-----------|
|                  |                  |                | X                       | Y         | Z         |
| 1                | 15               | 0              | -1.661000               | 1.090734  | -0.207279 |
| 2                | 15               | 0              | 1.051850                | -0.117762 | -0.947633 |
| 3                | 8                | 0              | -0.501856               | 0.821644  | 0.981064  |
| 4                | 6                | 0              | -3.027166               | -0.165714 | -0.070852 |
| 5                | 6                | 0              | -3.878525               | -0.132792 | -1.227392 |
| 6                | 6                | 0              | -3.469713               | -0.892270 | 1.086154  |
| 7                | 6                | 0              | -4.773817               | -1.362036 | 1.104446  |
| 8                | 6                | 0              | 4.819632                | -1.734368 | -0.761357 |
| 9                | 6                | 0              | 2.677913                | -2.920891 | -1.378802 |
| 10               | 6                | 0              | 3.733539                | 0.821579  | -1.026018 |
| 11               | 6                | 0              | -2.546744               | 2.461526  | 0.646920  |
| 12               | 6                | 0              | 5.076935                | 0.620009  | -0.682389 |
| 13               | 6                | 0              | -5.182723               | -0.625338 | -1.103544 |
| 14               | 6                | 0              | 3.466293                | -1.619861 | -1.064081 |
| 15               | 6                | 0              | 0.794533                | 0.429359  | 0.642840  |
| 16               | 6                | 0              | -2.292200               | -0.063626 | 3.204690  |
| 17               | 6                | 0              | -2.143988               | -0.234480 | -3.108713 |
| 18               | 6                | 0              | -5.671549               | -1.203122 | 0.050976  |
| 19               | 6                | 0              | -3.244329               | -2.325678 | 3.206087  |
| 20               | 6                | 0              | 1.656916                | 0.565909  | 1.846715  |
| 21               | 6                | 0              | 1.366451                | 1.550719  | 2.800372  |
| 22               | 6                | 0              | 5.624257                | -0.632028 | -0.477365 |
| 23               | 6                | 0              | 2.125715                | 1.670404  | 3.960347  |
| 24               | 6                | 0              | 7.060447                | -0.849484 | 0.014791  |
| 25               | 6                | 0              | -3.476493               | 0.384490  | -2.647167 |
| 26               | 6                | 0              | 6.992623                | -1.513299 | 1.396125  |
| 27               | 6                | 0              | 2.726050                | -0.300449 | 2.091504  |
| 28               | 6                | 0              | 3.176845                | 0.795785  | 4.197160  |
| 29               | 6                | 0              | -3.418235               | 1.920591  | -2.731264 |
| 30               | 6                | 0              | 3.315512                | 2.277261  | -1.394310 |
| 31               | 6                | 0              | -1.764167               | 3.773887  | 0.563033  |
| 32               | 6                | 0              | -7.100064               | -1.744294 | 0.173561  |
| 33               | 6                | 0              | -2.570879               | -1.274082 | 2.298549  |
| 34               | 6                | 0              | 2.886741                | -0.311874 | -1.048924 |
| 35               | 6                | 0              | 3.467296                | -0.183750 | 3.266659  |
| 36               | 6                | 0              | 2.869760                | 3.064298  | -0.153325 |
| 37               | 6                | 0              | 2.207987                | 2.328333  | -2.468340 |
| 38               | 6                | 0              | 1.814895                | -2.746339 | -2.650710 |
| 39               | 6                | 0              | -7.948872               | -1.420756 | -1.062062 |
| 40               | 6                | 0              | -7.045092               | -3.267111 | 0.337361  |
| 41               | 6                | 0              | 1.813424                | -3.341554 | -0.176706 |

|    |   |   |            |            |            |
|----|---|---|------------|------------|------------|
| 42 | 6 | 0 | 7. 825771  | 0. 467060  | 0. 172649  |
| 43 | 6 | 0 | 4. 516613  | 3. 025263  | -2. 002161 |
| 44 | 6 | 0 | -1. 278094 | -1. 940379 | 1. 794383  |
| 45 | 6 | 0 | -2. 644056 | 5. 006847  | 0. 774928  |
| 46 | 6 | 0 | 7. 832729  | -1. 747273 | -0. 949842 |
| 47 | 6 | 0 | 3. 620779  | -4. 096761 | -1. 676391 |
| 48 | 6 | 0 | -4. 505448 | -0. 052263 | -3. 714253 |
| 49 | 6 | 0 | -7. 787859 | -1. 125025 | 1. 395700  |
| 50 | 6 | 0 | -3. 584226 | 5. 266238  | -0. 383862 |
| 51 | 1 | 0 | 5. 637822  | 1. 346389  | -0. 594984 |
| 52 | 1 | 0 | 5. 197240  | -2. 629791 | -0. 719142 |
| 53 | 1 | 0 | 0. 627625  | 2. 155049  | 2. 643821  |
| 54 | 1 | 0 | -1. 788681 | 0. 635743  | 2. 799838  |
| 55 | 1 | 0 | -5. 060177 | -1. 850460 | 1. 836749  |
| 56 | 1 | 0 | -2. 666030 | 2. 317807  | -2. 222730 |
| 57 | 1 | 0 | -2. 538858 | -2. 636517 | 3. 908049  |
| 58 | 1 | 0 | -3. 379827 | 2. 524710  | 0. 159542  |
| 59 | 1 | 0 | -4. 026301 | -1. 953447 | 3. 690767  |
| 60 | 1 | 0 | 3. 703236  | 0. 894798  | 5. 041601  |
| 61 | 1 | 0 | -5. 786770 | -0. 550825 | -1. 869669 |
| 62 | 1 | 0 | 2. 930054  | -0. 985016 | 1. 490714  |
| 63 | 1 | 0 | 4. 108220  | -4. 389963 | -0. 858611 |
| 64 | 1 | 0 | 8. 771791  | -1. 862891 | -0. 642373 |
| 65 | 1 | 0 | -3. 467899 | -3. 096850 | 2. 695762  |
| 66 | 1 | 0 | -3. 334160 | 2. 197419  | -3. 688510 |
| 67 | 1 | 0 | 3. 105714  | -4. 827500 | -1. 977067 |
| 68 | 1 | 0 | 7. 897417  | -1. 365410 | -1. 841721 |
| 69 | 1 | 0 | -4. 223162 | 2. 373497  | -2. 367850 |
| 70 | 1 | 0 | 4. 228277  | -3. 898797 | -2. 400704 |
| 71 | 1 | 0 | -1. 784191 | -0. 328496 | 3. 939674  |
| 72 | 1 | 0 | 7. 353472  | 1. 062959  | 0. 795115  |
| 73 | 1 | 0 | 4. 204582  | -0. 812616 | 3. 402197  |
| 74 | 1 | 0 | -3. 155300 | 0. 329723  | 3. 501570  |
| 75 | 1 | 0 | 7. 436038  | -2. 623541 | -1. 030719 |
| 76 | 1 | 0 | -2. 770928 | 2. 253270  | 1. 544491  |
| 77 | 1 | 0 | 1. 931642  | 2. 353552  | 4. 614413  |
| 78 | 1 | 0 | 8. 781832  | 0. 271303  | 0. 445009  |
| 79 | 1 | 0 | 7. 962098  | 0. 943265  | -0. 694298 |
| 80 | 1 | 0 | -1. 419899 | 0. 073125  | -2. 541688 |
| 81 | 1 | 0 | -0. 875583 | -1. 474115 | 1. 066078  |
| 82 | 1 | 0 | 6. 569361  | -2. 415214 | 1. 377218  |
| 83 | 1 | 0 | 7. 909429  | -1. 666048 | 1. 743394  |
| 84 | 1 | 0 | -1. 451070 | -2. 860537 | 1. 469362  |
| 85 | 1 | 0 | 2. 767708  | 4. 015542  | -0. 369605 |
| 86 | 1 | 0 | -5. 336504 | 0. 446952  | -3. 614912 |
| 87 | 1 | 0 | -4. 161605 | 0. 208467  | -4. 581209 |
| 88 | 1 | 0 | 6. 497521  | -0. 911648 | 2. 070127  |
| 89 | 1 | 0 | 2. 462337  | -3. 486813 | 0. 649186  |
| 90 | 1 | 0 | 3. 545360  | 3. 002439  | 0. 596401  |
| 91 | 1 | 0 | 1. 362412  | 2. 101785  | -2. 112092 |
| 92 | 1 | 0 | 2. 054615  | 2. 721451  | 0. 196013  |
| 93 | 1 | 0 | -1. 944299 | 0. 048677  | -4. 029324 |
| 94 | 1 | 0 | -8. 699048 | -1. 521097 | 1. 531498  |
| 95 | 1 | 0 | 1. 157624  | -2. 708925 | 0. 032790  |

|     |   |   |           |           |           |
|-----|---|---|-----------|-----------|-----------|
| 96  | 1 | 0 | -7.251813 | -1.335832 | 2.240342  |
| 97  | 1 | 0 | 2.401721  | 1.691160  | -3.213899 |
| 98  | 1 | 0 | 5.242324  | 3.204638  | -1.349863 |
| 99  | 1 | 0 | 2.147563  | 3.244008  | -2.823498 |
| 100 | 1 | 0 | 1.126134  | -2.101442 | -2.602698 |
| 101 | 1 | 0 | 1.382184  | -4.222072 | -0.431974 |
| 102 | 1 | 0 | -6.569263 | -3.646790 | -0.436287 |
| 103 | 1 | 0 | 2.432224  | -2.519573 | -3.386675 |
| 104 | 1 | 0 | -2.216847 | -1.195752 | -3.100576 |
| 105 | 1 | 0 | -7.995349 | -0.426481 | -1.226442 |
| 106 | 1 | 0 | 4.234110  | 3.931679  | -2.353707 |
| 107 | 1 | 0 | -6.545071 | -3.506599 | 1.186961  |
| 108 | 1 | 0 | -7.554452 | -1.843116 | -1.951278 |
| 109 | 1 | 0 | 4.949998  | 2.527944  | -2.690299 |
| 110 | 1 | 0 | -7.972524 | -3.638644 | 0.432749  |
| 111 | 1 | 0 | -0.660938 | -1.997476 | 2.498333  |
| 112 | 1 | 0 | 1.349624  | -3.640920 | -2.858227 |
| 113 | 1 | 0 | -4.650227 | -1.034228 | -3.694104 |
| 114 | 1 | 0 | -7.839188 | -0.172776 | 1.324675  |
| 115 | 1 | 0 | -8.829030 | -1.774207 | -0.967742 |
| 116 | 1 | 0 | -1.060657 | 3.746838  | 1.200161  |
| 117 | 1 | 0 | -3.184922 | 4.861632  | 1.619933  |
| 118 | 1 | 0 | -1.323066 | 3.842792  | -0.325282 |
| 119 | 1 | 0 | -4.193258 | 4.545353  | -0.554344 |
| 120 | 1 | 0 | -2.073407 | 5.764579  | 0.884303  |
| 121 | 1 | 0 | -3.063754 | 5.415212  | -1.230859 |
| 122 | 1 | 0 | -4.155640 | 6.074961  | -0.195433 |

---

### TD-SCF Calculation for 3

# td=(nstates=10) wb97xd/6-31g(2d,p)

Excited State 1: Singlet-A 3.6360 eV 340.99 nm f=0.0533  
<S\*\*2>=0.000

194 -> 197 0.15657  
196 -> 197 0.66249

Excited State 2: Singlet-A 4.1617 eV 297.92 nm f=0.1715  
<S\*\*2>=0.000

194 -> 197 -0.19521  
195 -> 197 0.63666  
196 -> 197 0.12650

## 6. NMR Charts

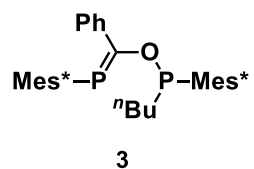

$^1\text{H}$  NMR

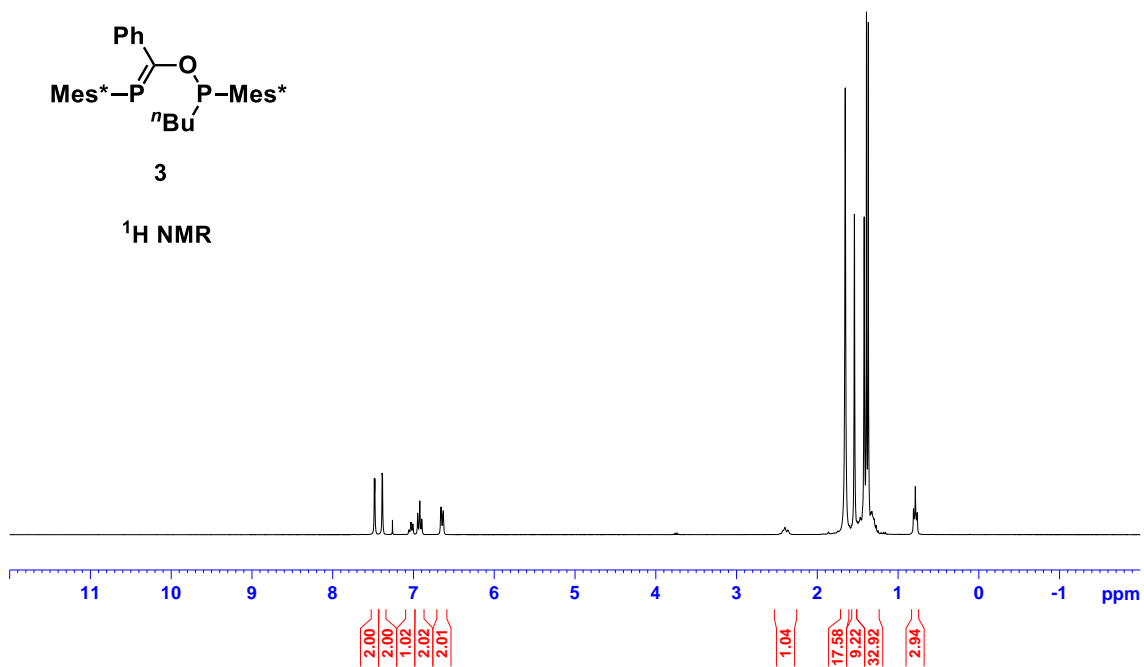

$^{31}\text{P}\{^1\text{H}\}$  NMR

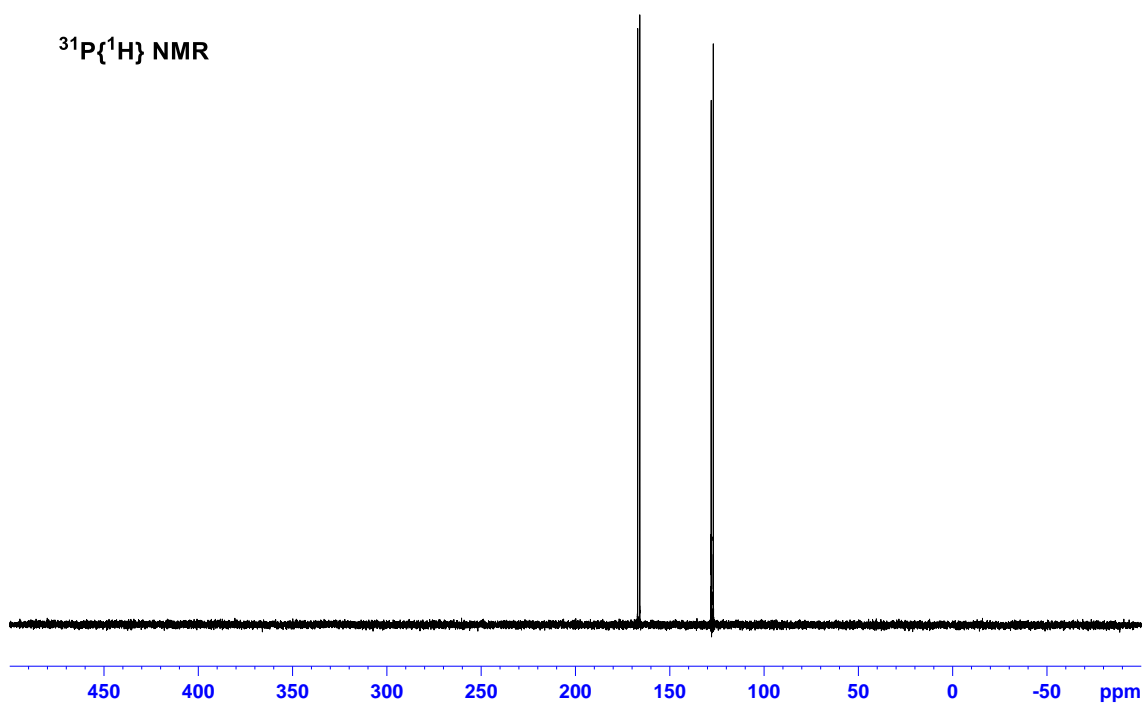

$^{13}\text{C}\{^1\text{H}\}$  NMR

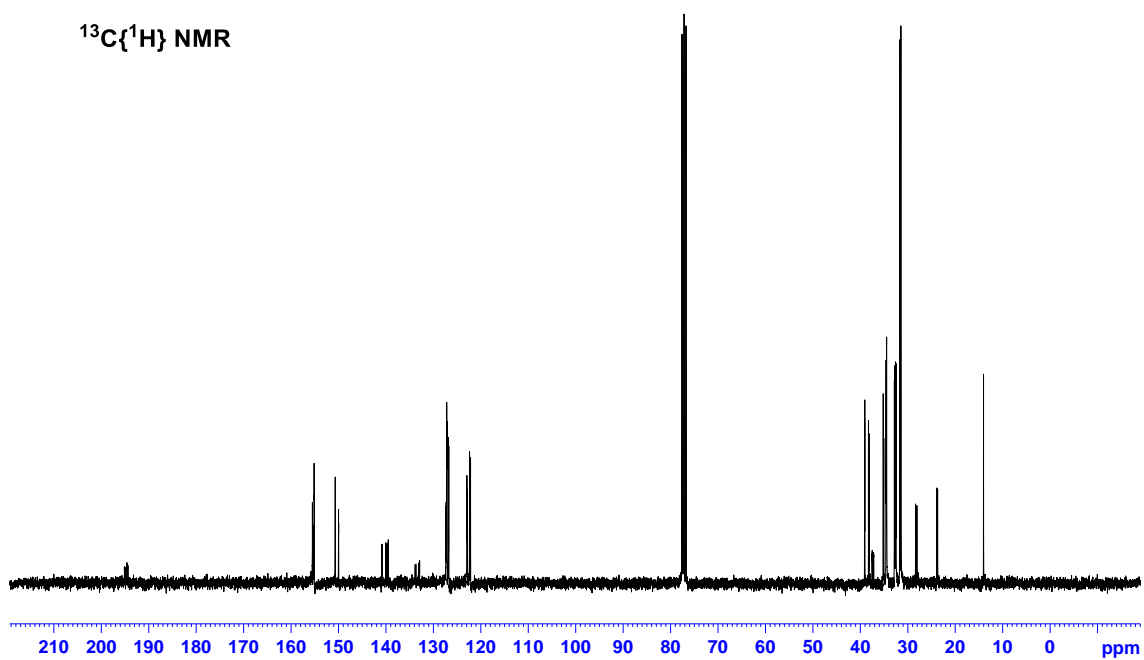

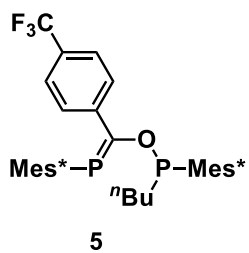

$^1\text{H}$  NMR

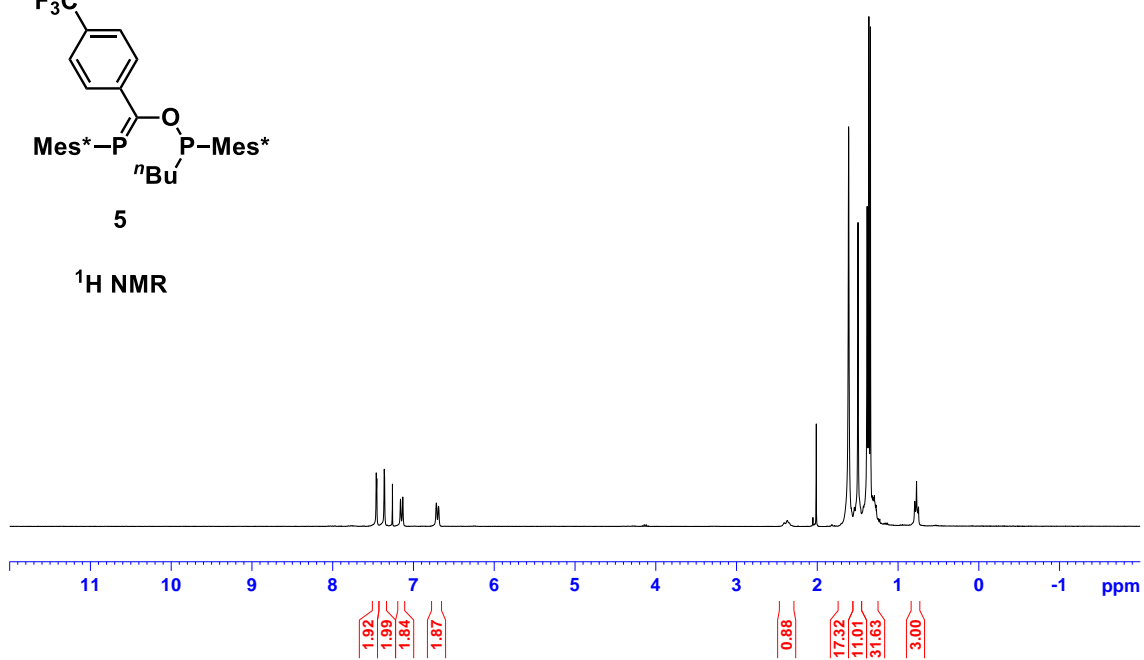

$^{31}\text{P}\{^1\text{H}\}$  NMR

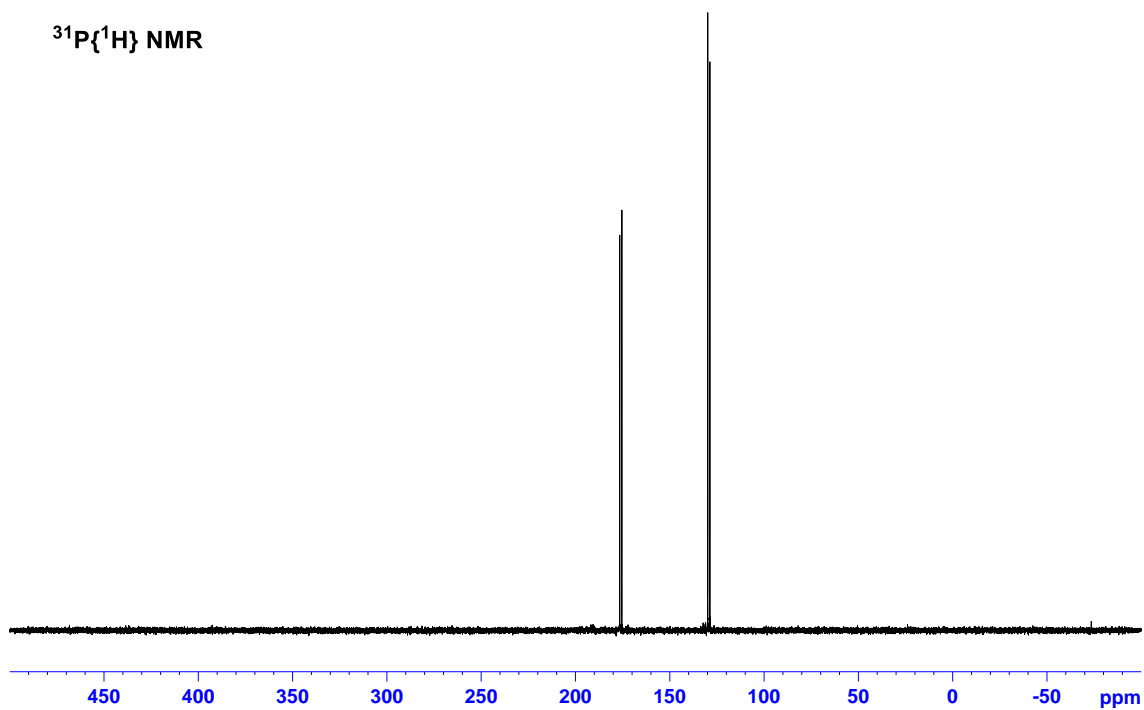

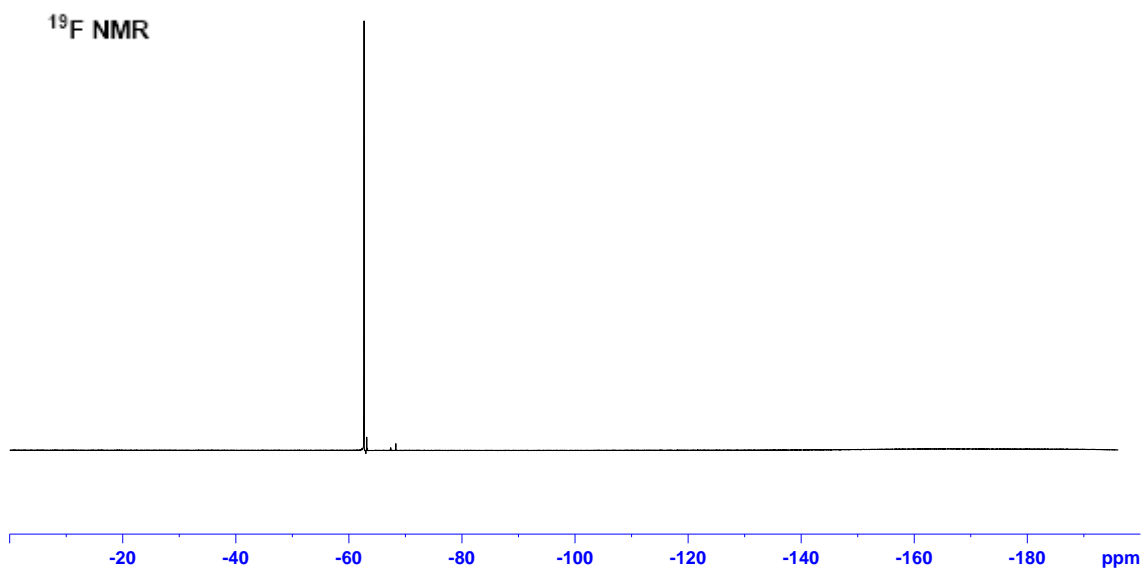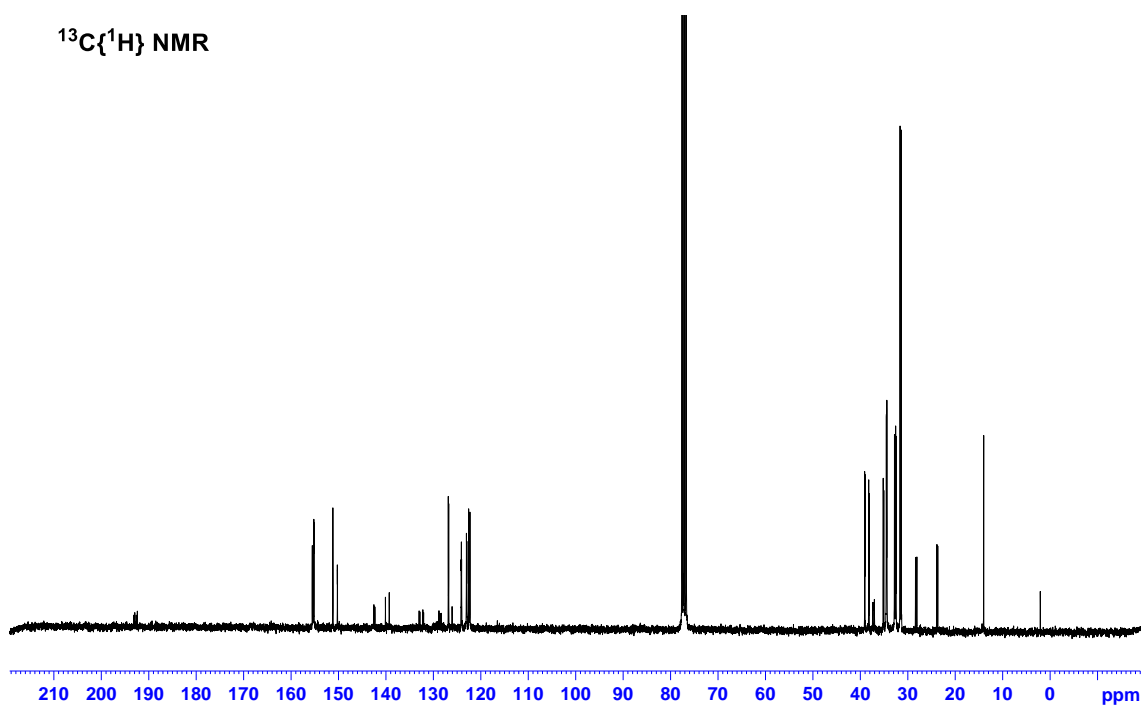

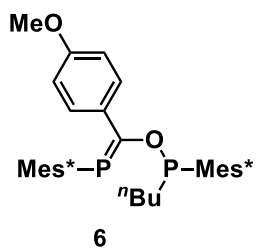

$^1\text{H}$  NMR

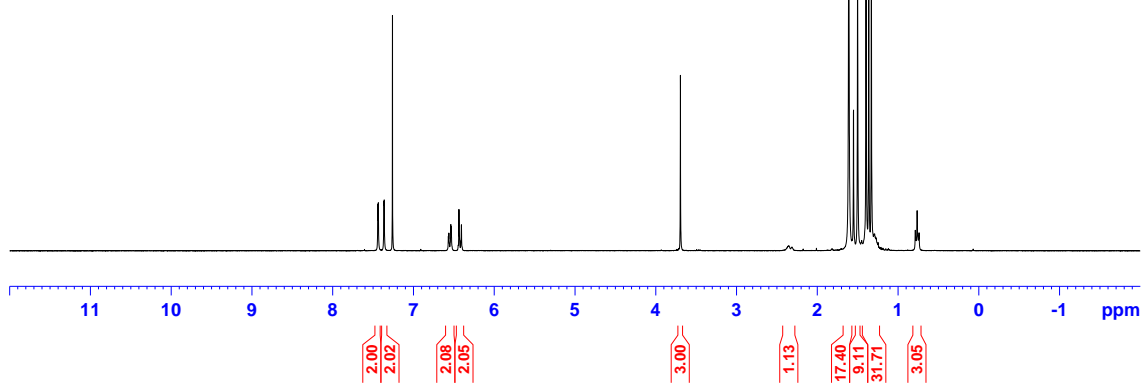

$^{31}\text{P}\{^1\text{H}\}$  NMR

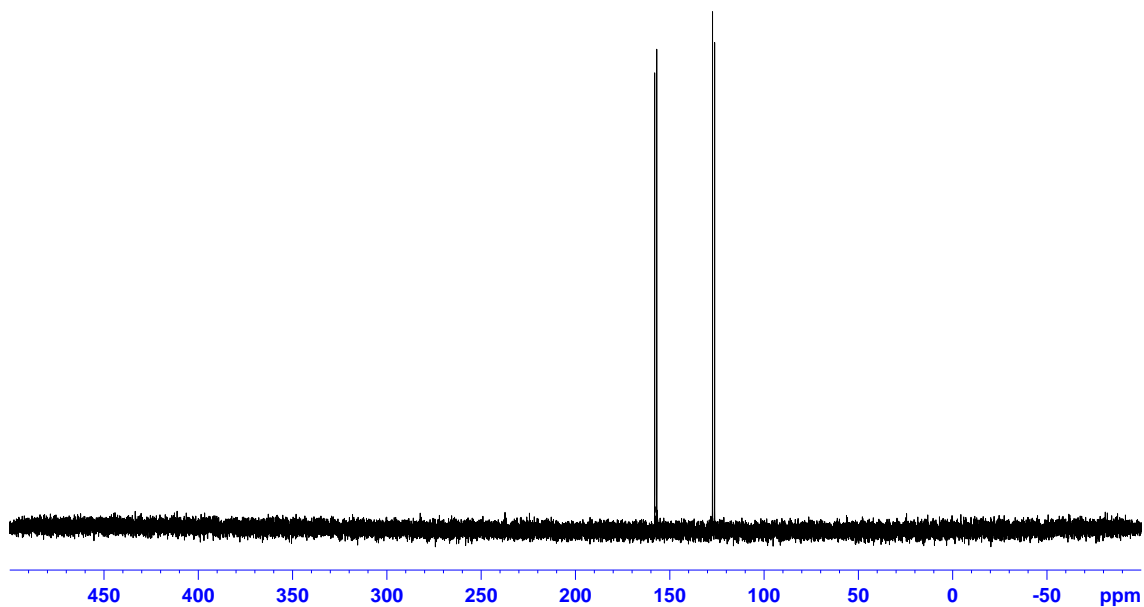



$^{13}\text{C}\{^1\text{H}\}$  NMR

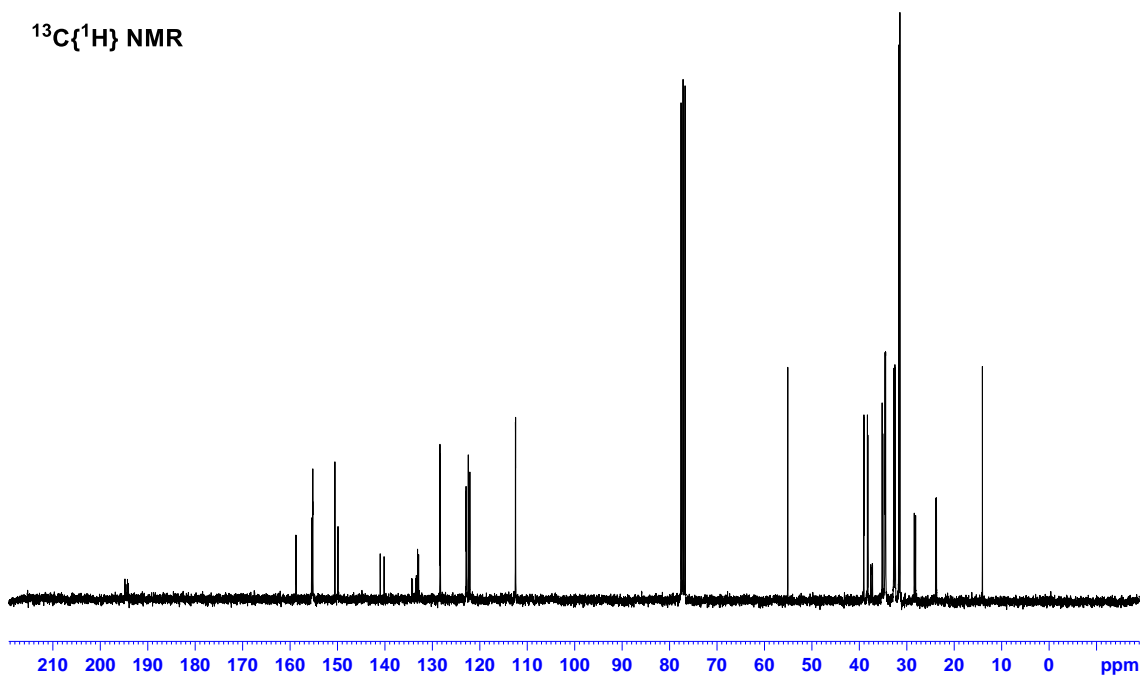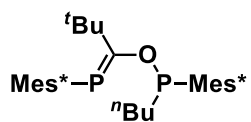

7

$^1\text{H}$  NMR

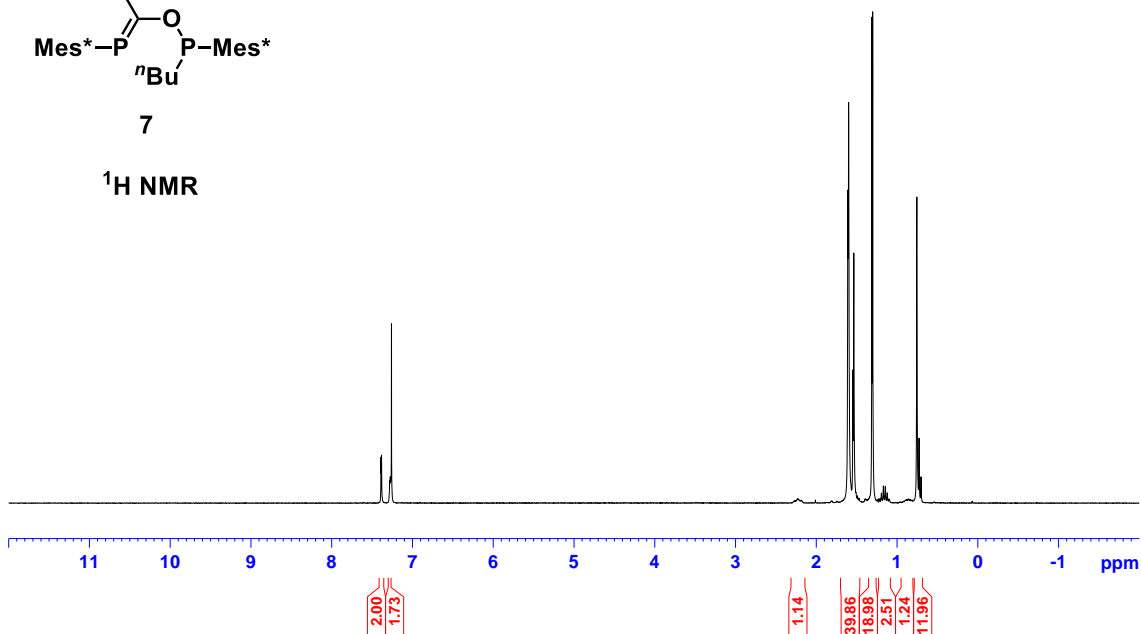

$^{31}\text{P}\{^1\text{H}\}$  NMR

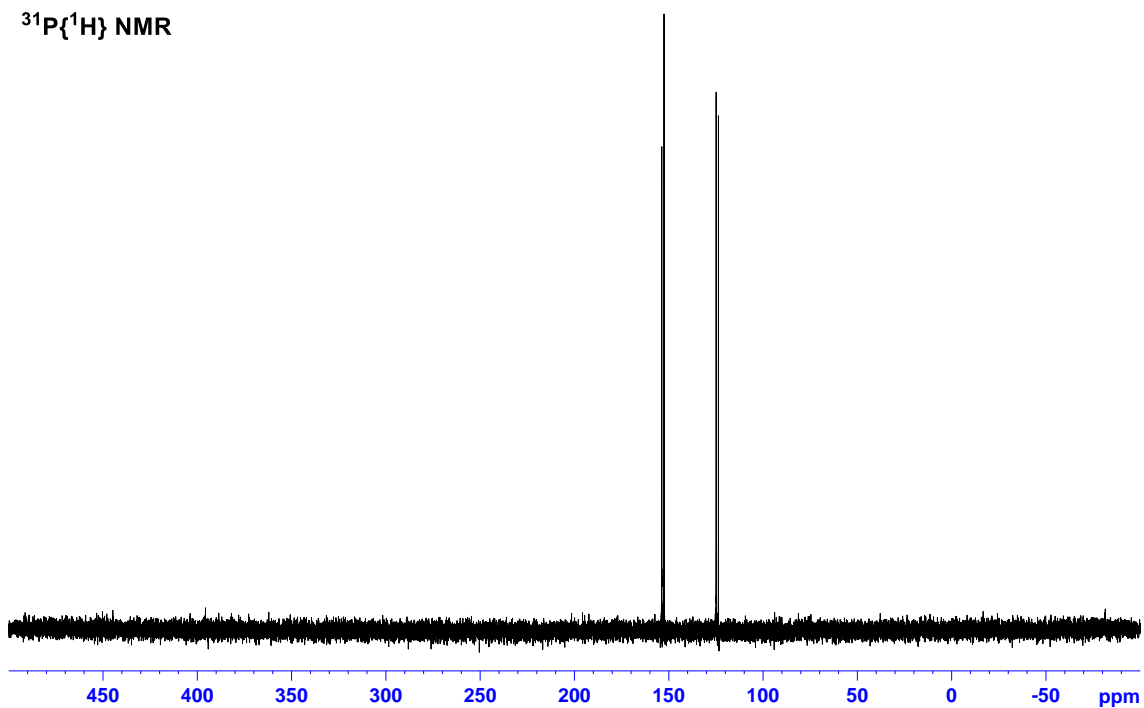

$^{13}\text{C}\{^1\text{H}\}$  NMR

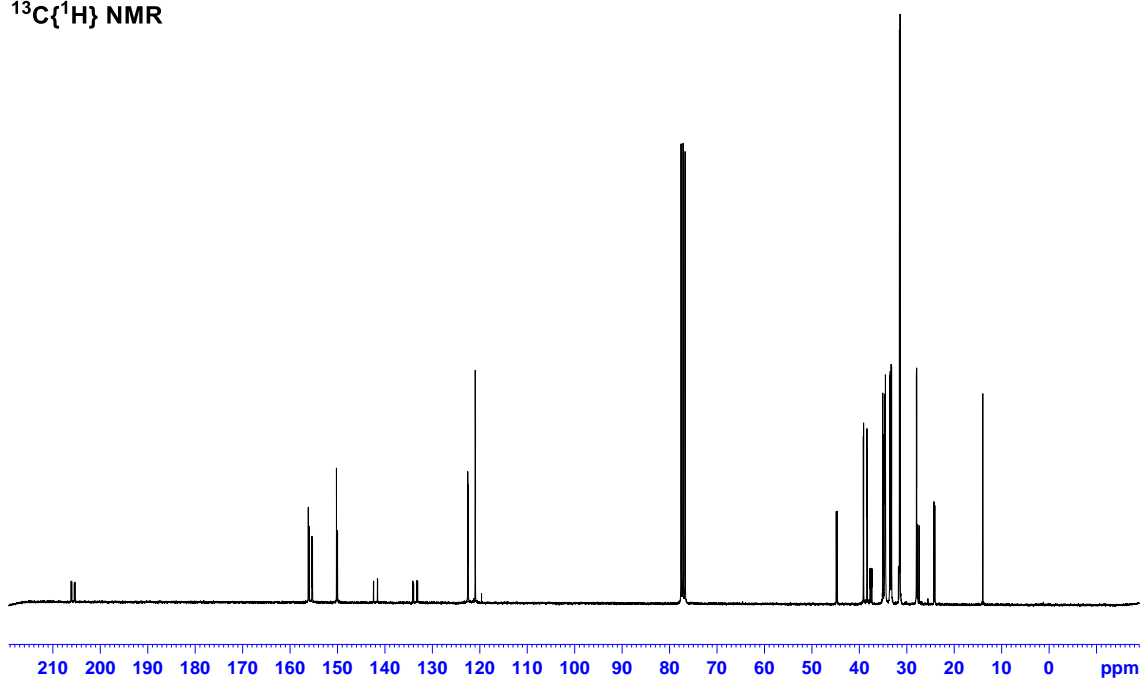

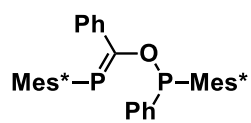

8

$^1\text{H}$  NMR

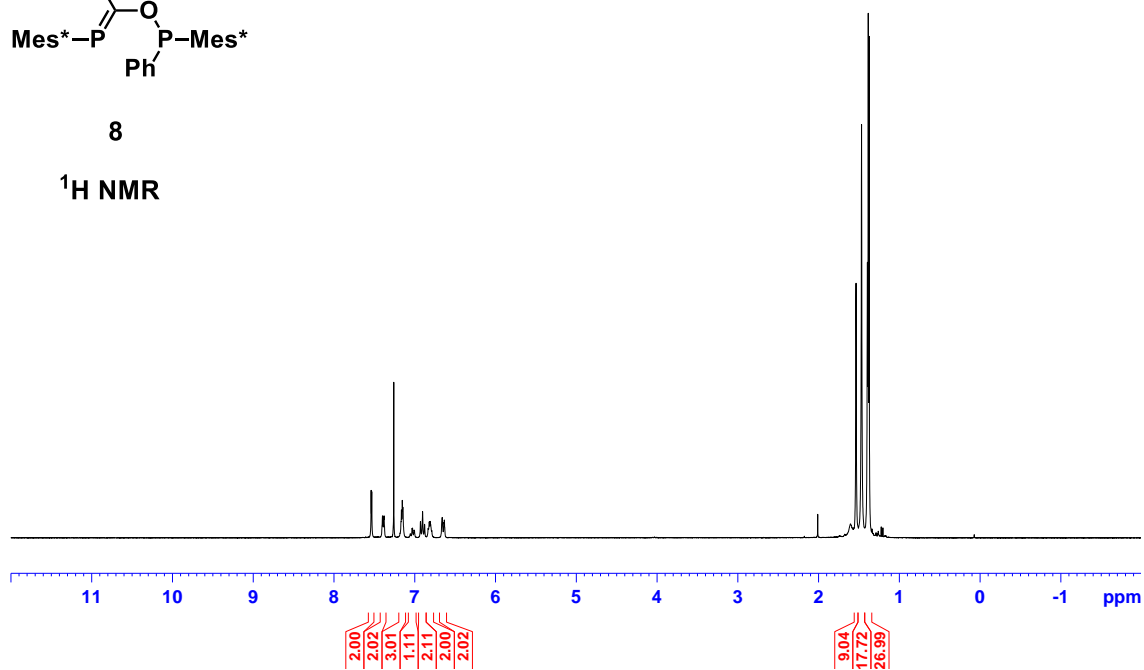

$^{31}\text{P}\{^1\text{H}\}$  NMR

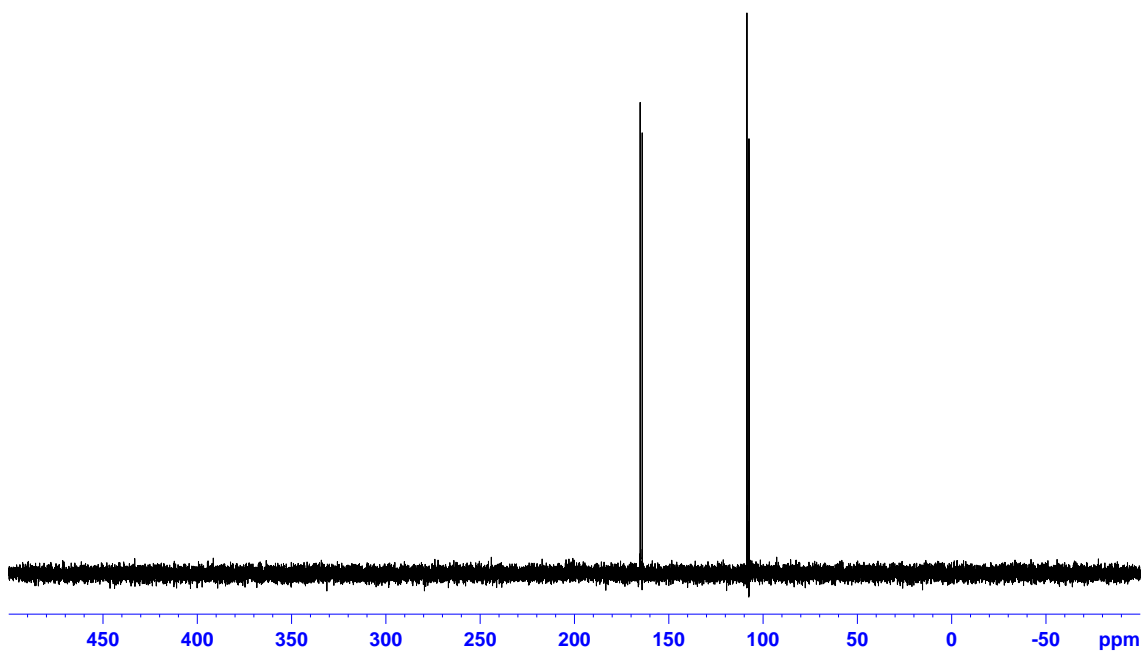

$^{13}\text{C}\{^1\text{H}\}$  NMR

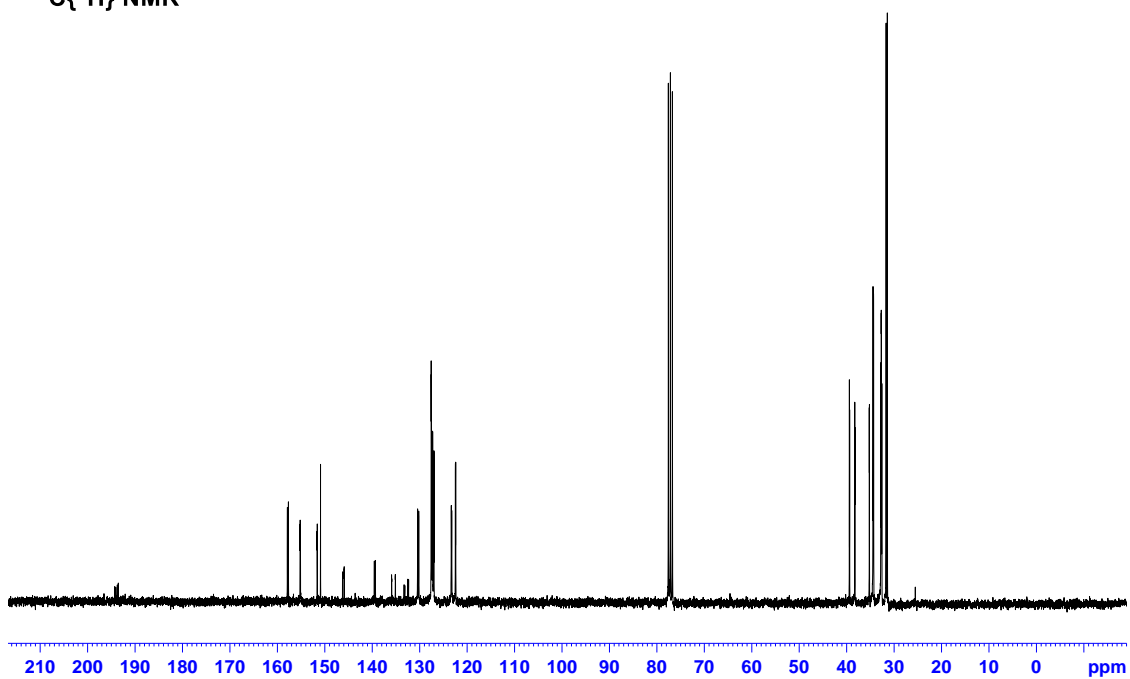

## 7. References

- 1 G. Sheldrick and T. Schneider, *Methods Enzymol.*, 1997, **227**, 319.
- 2 Yadokari-XG, Software for Crystal Structure Analyses, K. Wakita (2001); Release of Software (Yadokari-XG 2009) for Crystal Structure Analyses, C. Kabuto, S. Akine, T. Nemoto and E. Kwon, *J. Cryst. Soc. Jpn.*, 2009, **51**, 218.
- 3 Gaussian09: M. J. Frisch, G. W. Trucks, H. B. Schlegel, G. E. Scuseria, M. A. Robb, J. R. Cheeseman, G. Scalmani, V. Barone, B. Mennucci, G. A. Petersson, H. Nakatsuji, M. Caricato, X. Li, H. P. Hratchian, A. F. Izmaylov, J. Bloino, G. Zheng, J. L. Sonnenberg, M. Hada, M. Ehara, K. Toyota, R. Fukuda, J. Hasegawa, M. Ishida, T. Nakajima, Y. Honda, O. Kitao, H. Nakai, T. Vreven, J. A. Montgomery, Jr., J. E. Peralta, F. Ogliaro, M. Bearpark, J. J. Heyd, E. Brothers, K. N. Kudin, V. N. Staroverov, T. Keith, R. Kobayashi, J. Normand, K. Raghavachari, A. Rendell, J. C. Burant, S. S. Iyengar, J. Tomasi, M. Cossi, N. Rega, J. M. Millam, M. Klene, J. E. Knox, J. B. Cross, V. Bakken, C. Adamo, J. Jaramillo, R. Gomperts, R. E. Stratmann, O. Yazyev, A. J. Austin, R. Cammi, C. Pomelli, J. W. Ochterski, R. L. Martin, K. Morokuma, V. G. Zakrzewski, G. A. Voth, P. Salvador, J. J. Dannenberg, S. Dapprich, A. D. Daniels, O. Farkas, J. B. Foresman, J. V. Ortiz and J. Cioslowski, D. J. Fox, Gaussian 09, Revision B.01, Gaussian, Inc., Wallingford CT, 2010.
- 4 a) M. Yoshifuji, I. Shima, N. Inamoto, K. Hirotsu and T. Higuchi, *J. Am. Chem. Soc.*, 1981, **100**, 4587; b) H. H. Karsch, in *Synthetic Methods of Organometallic and Inorganic Chemistry* (W. A. Hermann Ed.), Thieme, Stuttgart, 1996.
